# Supplementary material for: Pan-cancer analysis of kinesin family members with potential implications in prognosis and immunological role in human cancer
Source: Front Oncol. 2023 Aug 29;13:1179897. doi: 10.3389/fonc.2023.1179897 (PMC10498125; doi:10.3389/fonc.2023.1179897)
Supplement: Supplementary file 2 [file Table_1.xlsx]

## Sheet: Supplementary Table 1
Supplementary Table 1. Summary of 38 recognized Kinesin Family Member
Gene	Type
KIF2B	Kinesin Family Member
KIF11	Kinesin Family Member
KIF26A	Kinesin Family Member
KIF7	Kinesin Family Member
KIF22	Kinesin Family Member
KIF20A	Kinesin Family Member
KIF19	Kinesin Family Member
KIF19BP	Kinesin Family Member
KIF2C	Kinesin Family Member
KIF6	Kinesin Family Member
KIFC1	Kinesin Family Member
KIF4A	Kinesin Family Member
KIF12	Kinesin Family Member
KIF23	Kinesin Family Member
KIF14	Kinesin Family Member
KIF24	Kinesin Family Member
KIF25	Kinesin Family Member
KIF1B	Kinesin Family Member
KIF4B	Kinesin Family Member
KIF5C	Kinesin Family Member
KIF13A	Kinesin Family Member
KIF3A	Kinesin Family Member
KIF16B	Kinesin Family Member
KIF2A	Kinesin Family Member
KIF3B	Kinesin Family Member
KIF5B	Kinesin Family Member
KIF21B	Kinesin Family Member
KIF18B	Kinesin Family Member
KIF28P	Kinesin Family Member
KIF5A	Kinesin Family Member
KIF17	Kinesin Family Member
KIF26B	Kinesin Family Member
KIF1C	Kinesin Family Member
KIF3C	Kinesin Family Member
KIF15	Kinesin Family Member
KIF20B	Kinesin Family Member
KIFC3	Kinesin Family Member
KIF27	Kinesin Family Member

## Sheet: Supplementary Table 2
Supplementary Table 2. Summary of 122 immune related genes
Gene	Type
XCL2	Chemokine
XCL1	Chemokine
CXCL9	Chemokine
CXCL8	Chemokine
CXCL6	Chemokine
CXCL5	Chemokine
CXCL3	Chemokine
CXCL2	Chemokine
CXCL17	Chemokine
CXCL16	Chemokine
CXCL14	Chemokine
CXCL13	Chemokine
CXCL12	Chemokine
CXCL11	Chemokine
CXCL10	Chemokine
CXCL1	Chemokine
CX3CL1	Chemokine
CCL8	Chemokine
CCL7	Chemokine
CCL5	Chemokine
CCL4	Chemokine
CCL3	Chemokine
CCL28	Chemokine
CCL27	Chemokine
CCL26	Chemokine
CCL25	Chemokine
CCL24	Chemokine
CCL23	Chemokine
CCL22	Chemokine
CCL21	Chemokine
CCL20	Chemokine
CCL2	Chemokine
CCL19	Chemokine
CCL18	Chemokine
CCL17	Chemokine
CCL16	Chemokine
CCL15	Chemokine
CCL14	Chemokine
CCL13	Chemokine
CCL11	Chemokine
CCL1	Chemokine
XCR1	Chemokine receptor
CXCR6	Chemokine receptor
CXCR5	Chemokine receptor
CXCR4	Chemokine receptor
CXCR3	Chemokine receptor
CXCR2	Chemokine receptor
CXCR1	Chemokine receptor
CX3CR1	Chemokine receptor
CCR9	Chemokine receptor
CCR8	Chemokine receptor
CCR7	Chemokine receptor
CCR6	Chemokine receptor
CCR5	Chemokine receptor
CCR4	Chemokine receptor
CCR3	Chemokine receptor
CCR2	Chemokine receptor
CCR10	Chemokine receptor
CCR1	Chemokine receptor
ULBP1	Immunomodulator
TNFSF9	Immunomodulator
TNFSF4	Immunomodulator
TNFSF18	Immunomodulator
TNFSF15	Immunomodulator
TNFSF14	Immunomodulator
TNFSF13B	Immunomodulator
TNFSF13	Immunomodulator
TNFRSF9	Immunomodulator
TNFRSF8	Immunomodulator
TNFRSF4	Immunomodulator
TNFRSF25	Immunomodulator
TNFRSF18	Immunomodulator
TNFRSF17	Immunomodulator
TNFRSF14	Immunomodulator
TNFRSF13C	Immunomodulator
TNFRSF13B	Immunomodulator
TMIGD2	Immunomodulator
RAET1E	Immunomodulator
PVR	Immunomodulator
NT5E	Immunomodulator
MICB	Immunomodulator
LTA	Immunomodulator
KLRK1	Immunomodulator
KLRC1	Immunomodulator
IL6R	Immunomodulator
IL6	Immunomodulator
IL2RA	Immunomodulator
ICOSLG	Immunomodulator
ICOS	Immunomodulator
HHLA2	Immunomodulator
ENTPD1	Immunomodulator
CD86	Immunomodulator
CD80	Immunomodulator
CD70	Immunomodulator
CD48	Immunomodulator
CD40LG	Immunomodulator
CD40	Immunomodulator
CD28	Immunomodulator
CD276	Immunomodulator
CD27	Immunomodulator
BTNL2	Immunomodulator
TAPBP	Major histocompatibility complex
TAP2	Major histocompatibility complex
TAP1	Major histocompatibility complex
HLA-G	Major histocompatibility complex
HLA-F	Major histocompatibility complex
HLA-E	Major histocompatibility complex
HLA-DRB1	Major histocompatibility complex
HLA-DRA	Major histocompatibility complex
HLA-DQB1	Major histocompatibility complex
HLA-DQA2	Major histocompatibility complex
HLA-DQA1	Major histocompatibility complex
HLA-DPB1	Major histocompatibility complex
HLA-DPA1	Major histocompatibility complex
HLA-DOB	Major histocompatibility complex
HLA-DOA	Major histocompatibility complex
HLA-DMB	Major histocompatibility complex
HLA-DMA	Major histocompatibility complex
HLA-C	Major histocompatibility complex
HLA-B	Major histocompatibility complex
HLA-A	Major histocompatibility complex
B2M	Major histocompatibility complex

## Sheet: Supplementary Table 3
Supplementary Table 3. Summary of KIFscores between TCGA, CCLE and GTEx
TCGAscore			CCLEscore			GTEXscore
Type	KIFscore		Type	KIFscore		Type	KIFscore
ACC	0.135299		ALL	0.539587		Adipose	-0.594996
BLCA	0.89733		BLCA	0.0890087		Adrenal Gland	-0.225235
BRCA	0.243429		BRCA	-0.32905		Bladder	-0.164323
CESC	1.14995		CESC	-0.262167		Brain	-0.299968
CHOL	-0.189108		CLL	-0.88334		Breast	-0.709267
COAD	-0.0468225		COAD	-0.954672		Cervix	-0.104842
DLBC	1.01599		DLBC	0.538081		Colon	0.299915
ESCA	0.82138		ESCA	-0.309842		Esophagus	0.319052
GBM	0.696627		GBM	-0.0945471		Fallopian Tube	-0.787818
HNSC	0.800779		HNSC	-0.150669		Heart	-0.630855
KICH	-1.01146		KIRC	-0.0756163		Kidney	-0.830194
KIRC	-0.896006		LAML	-0.0855865		Liver	-0.749971
KIRP	-1.08114		LCML	-0.0261036		Lung	-0.575141
LAML	0.449219		LGG	0.191745		Minor Salivary Gland	0.0310804
LGG	-0.0882227		LIHC	-0.170756		Muscle	-1.29087
LIHC	-0.56821		LUAD	0.153654		Nerve	0.27866
LUAD	0.0202656		LUSC	0.196024		Ovary	-0.0604644
LUSC	1.0359		MB	-0.27401		Pancreas	-0.446815
MESO	-0.0260551		MESO	0.11606		Pituitary	0.253492
OV	0.944116		MM	-0.399942		Prostate	0.123015
PAAD	-0.372793		NB	1.68584		Skin	0.725914
PCPG	0.278334		OV	-0.0156408		Small Intestine	0.626375
PRAD	-0.857587		PAAD	0.239423		Spleen	0.0184962
READ	-0.0643957		PRAD	0.147326		Stomach	0.123826
SARC	0.488415		SARC	0.232538		Testis	0.91431
SKCM	0.281572		SCLC	1.15118		Thyroid	-0.771511
STAD	0.103978		SKCM	-0.558397		Uterus	-0.313795
TGCT	0.655055		STAD	-0.786567		Vagina	0.88872
THCA	-1.4843		THCA	0.350359		Whole Blood	0.484325
THYM	0.687408		UCEC	-0.00155373
UCEC	0.512626
UCS	1.23619
UVM	-0.941045

## Sheet: Supplementary Table 4
Supplementary Table 4. Correlations of arm-level CNV gains and losses with KIFscores in cancers
Correlations of CNV gains with KIFscores									Correlations of CNV losses with KIFscores
tumor	arms	coefficient	std.error	p.value	adj_pvalue	significance			tumor	arms	coefficient	std.error	p.value	adj_pvalue	significance
BLCA	10p	0.3037	0.077953	0.000115381	0.00171547	2.76562			BLCA	10p	0.42995	0.175438	0.0147558	0.0603648	1.21922
BLCA	10q	0.261188	0.600946	0.664104	0.817087	0.0877315			BLCA	10q	0.0999515	0.0889286	0.261716	0.418855	0.377936
BLCA	11p	0.386558	0.270161	0.153374	0.335719	0.474024			BLCA	11p	-0.0308154	0.0907708	0.734426	0.831118	0.0803373
BLCA	11q	-0.0199235	0.137706	0.885038	0.939906	0.0269158			BLCA	11q	0.245658	0.201006	0.222407	0.377603	0.422965
BLCA	12p	0.240659	0.106877	0.024899	0.098102	1.00832			BLCA	12p	-0.0839014	0.204586	0.681968	0.786886	0.104088
BLCA	12q	0.287381	0.227698	0.207662	0.41115	0.386			BLCA	12q	0.27775	0.244879	0.257394	0.414007	0.382992
BLCA	13q	0.0354625	0.0755065	0.638895	0.797865	0.0980708			BLCA	13q	0.34505	0.0889276	0.000126272	0.00126717	2.89717
BLCA	14q	0.330867	0.126241	0.00918925	0.0489265	1.31046			BLCA	14q	0.194129	0.0758158	0.0108507	0.0484146	1.31502
BLCA	15q	-0.0949113	0.180088	0.598543	0.765071	0.116298			BLCA	15q	0.150992	0.0749027	0.044512	0.133536	0.874401
BLCA	16p	0.171934	0.173614	0.322637	0.54195	0.266041			BLCA	16p	0.444289	0.180376	0.0142077	0.0587509	1.23099
BLCA	16q	0.172544	0.145658	0.236919	0.44878	0.347967			BLCA	16q	0.290117	0.156484	0.0645084	0.17135	0.766115
BLCA	17p	-0.0342137	0.32341	0.91582	0.959662	0.0178816			BLCA	17p	0.0988006	0.0695279	0.156106	0.301568	0.520615
BLCA	17q	-0.0500246	0.0810358	0.537383	0.7153	0.145512			BLCA	17q	0.129321	0.599114	0.829231	0.894728	0.0483092
BLCA	18p	0.186366	0.0668944	0.0056001	0.034458	1.46271			BLCA	18p	0.265699	0.192333	0.168039	0.318194	0.497309
BLCA	18q	0.112045	0.174665	0.521628	0.708667	0.149558			BLCA	18q	0.152694	0.0884427	0.085061	0.207466	0.683054
BLCA	19p	0.19114	0.190071	0.315238	0.536517	0.270416			BLCA	19p	0.320277	0.142568	0.0252331	0.0910845	1.04056
BLCA	19q	0.157917	0.108438	0.146112	0.330851	0.480368			BLCA	19q	-0.0176142	0.34787	0.959645	0.969786	0.013324
BLCA	1p	0.227082	0.189347	0.231149	0.441292	0.355274			BLCA	1p	0.236391	0.200029	0.238018	0.395766	0.402562
BLCA	1q	0.0628018	0.0843281	0.456879	0.660588	0.180069			BLCA	1q	0.609796	0.348373	0.0809182	0.200982	0.696843
BLCA	20p	0.118473	0.160589	0.461124	0.663048	0.178455			BLCA	20p	0.0150239	0.16817	0.92886	0.948059	0.0231646
BLCA	20q	0.0724079	0.111465	0.516325	0.705138	0.151726			BLCA	20q	0.484148	0.600483	0.420616	0.591433	0.228095
BLCA	21q	0.206642	0.069833	0.00329439	0.0223791	1.65016			BLCA	21q	0.189437	0.100375	0.0600442	0.161739	0.791186
BLCA	22q	0.126448	0.107628	0.240998	0.453237	0.343675			BLCA	22q	0.206764	0.0688012	0.0028377	0.0177937	1.74973
BLCA	2p	0.188995	0.0758674	0.0131438	0.0624845	1.20423			BLCA	2p	0.827301	0.601231	0.169713	0.320033	0.494805
BLCA	2q	0.143277	0.348336	0.681083	0.828369	0.0817763			BLCA	2q	0.102511	0.103288	0.321575	0.490049	0.30976
BLCA	3p	0.276351	0.163388	0.0916151	0.239049	0.621514			BLCA	3p	0.268195	0.113867	0.0190072	0.0724698	1.13984
BLCA	3q	0.220283	0.0810736	0.00687594	0.0395492	1.40286			BLCA	3q	0.0358227	0.604818	0.952804	0.965424	0.015282
BLCA	4p	-0.0107427	0.147008	0.941784	0.9701	0.0131837			BLCA	4p	0.182433	0.148143	0.218907	0.373803	0.427357
BLCA	4q	-0.369758	0.257106	0.151207	0.335719	0.474024			BLCA	4q	0.121169	0.167379	0.469546	0.63384	0.19802
BLCA	5p	0.15601	0.0499595	0.00192518	0.0158092	1.80109			BLCA	5p	0.290394	0.28277	0.305303	0.472227	0.325849
BLCA	5q	0.0866391	0.221841	0.696401	0.831796	0.0799831			BLCA	5q	0.173554	0.0726049	0.0173065	0.0675483	1.17039
BLCA	6p	0.194414	0.121786	0.111218	0.275596	0.559727			BLCA	6p	0.163606	0.274178	0.551059	0.708504	0.149658
BLCA	6q	NA	NA	NA	NA	NA			BLCA	6q	0.135614	0.10058	0.178327	0.330316	0.48107
BLCA	7p	0.169649	0.0880526	0.0547444	0.171867	0.764808			BLCA	7p	0.318539	0.270853	0.240345	0.397282	0.400901
BLCA	7q	0.307561	0.130012	0.0184917	0.0787647	1.10367			BLCA	7q	0.38289	0.202265	0.0591223	0.160956	0.793294
BLCA	8p	0.0407285	0.128991	0.75243	0.863978	0.0634975			BLCA	8p	0.258289	0.0604651	2.45743e-05	0.000313323	3.50401
BLCA	8q	0.111508	0.0537879	0.038811	0.138385	0.858911			BLCA	8q	-0.864977	0.624232	0.16694	0.318194	0.497309
BLCA	9p	0.267593	0.116811	0.0225459	0.0901835	1.04487			BLCA	9p	0.080103	0.108331	0.46011	0.625194	0.203985
BLCA	9q	0.15887	0.139381	0.255082	0.459965	0.337275			BLCA	9q	-0.171919	0.141483	0.225079	0.379534	0.420749
BRCA	10p	0.568247	0.0685978	3.59253e-16	2.83092e-13	12.5481			BRCA	10p	0.123586	0.221361	0.576767	0.725702	0.139242
BRCA	10q	0.445154	0.19148	0.0202794	0.084106	1.07517			BRCA	10q	0.507538	0.113675	8.87647e-06	0.000128123	3.89237
BRCA	11p	0.226769	0.113896	0.0467394	0.15651	0.805458			BRCA	11p	0.73798	0.162503	6.2498e-06	9.3747e-05	4.02804
BRCA	11q	0.295151	0.173896	0.0899717	0.238545	0.62243			BRCA	11q	0.141966	0.0788678	0.0721388	0.184569	0.733841
BRCA	12p	0.589569	0.0854151	8.89577e-12	1.28957e-09	8.88956			BRCA	12p	0.143238	0.149098	0.336934	0.505401	0.296364
BRCA	12q	-0.011109	0.171995	0.948514	0.974483	0.0112256			BRCA	12q	0.563235	0.173757	0.00122638	0.00868688	2.06114
BRCA	13q	0.397902	0.0956543	3.56599e-05	0.000658307	3.18157			BRCA	13q	0.400089	0.0537984	2.21e-13	3.3813e-11	10.4709
BRCA	14q	0.175895	0.085568	0.0401165	0.142395	0.846504			BRCA	14q	0.719016	0.0649498	6.49104e-27	4.96564e-24	23.304
BRCA	15q	0.314779	0.106618	0.00323905	0.0221946	1.65375			BRCA	15q	0.40317	0.0637401	3.79525e-10	2.23336e-08	7.65104
BRCA	16p	-0.205227	0.0498501	4.1389e-05	0.000724767	3.1398			BRCA	16p	0.769112	0.286951	0.00750686	0.0368125	1.434
BRCA	16q	-0.232829	0.151741	0.125406	0.302934	0.518652			BRCA	16q	-0.437468	0.0527711	3.45349e-16	8.80639e-14	13.0552
BRCA	17p	0.29274	0.157246	0.0630171	0.187387	0.727262			BRCA	17p	0.160226	0.0584163	0.00619497	0.0318064	1.49749
BRCA	17q	0.213911	0.0694356	0.00211822	0.0168602	1.77314			BRCA	17q	0.340631	0.347291	0.326927	0.496228	0.304318
BRCA	18p	0.651286	0.110451	5.04416e-09	2.83914e-07	6.54681			BRCA	18p	0.39087	0.11659	0.000829866	0.00634847	2.19733
BRCA	18q	0.710434	0.165679	1.97352e-05	0.000457392	3.33971			BRCA	18q	0.513416	0.124004	3.74711e-05	0.000427842	3.36872
BRCA	19p	0.528085	0.218385	0.0157722	0.0706163	1.15109			BRCA	19p	0.373498	0.144274	0.00976338	0.0444583	1.35205
BRCA	19q	0.19142	0.127467	0.13347	0.313953	0.503136			BRCA	19q	0.313475	0.254741	0.218767	0.373803	0.427357
BRCA	1p	0.153573	0.123536	0.214126	0.417946	0.37888			BRCA	1p	0.213193	0.0792138	0.00723108	0.0357629	1.44657
BRCA	1q	-0.112997	0.0367592	0.00216598	0.0170679	1.76782			BRCA	1q	0.427399	0.602593	0.478444	0.638761	0.194662
BRCA	20p	0.349062	0.152764	0.0225168	0.0901835	1.04487			BRCA	20p	0.500767	0.142004	0.000439504	0.00374903	2.42608
BRCA	20q	0.37277	0.0954054	9.92731e-05	0.00156454	2.80561			BRCA	20q	0.811108	0.318202	0.0109487	0.0484146	1.31502
BRCA	21q	0.558908	0.0713315	1.2521e-14	3.28885e-12	11.483			BRCA	21q	0.379474	0.0800203	2.44246e-06	4.6712e-05	4.33057
BRCA	22q	0.463373	0.110507	3.11684e-05	0.000614017	3.21182			BRCA	22q	0.159501	0.0538765	0.00314318	0.0193914	1.71239
BRCA	2p	0.564838	0.134431	2.87304e-05	0.000580502	3.2362			BRCA	2p	0.107735	0.243205	0.657874	0.775726	0.110292
BRCA	2q	0.760891	0.418005	0.0690017	0.201383	0.695978			BRCA	2q	0.720867	0.160375	7.72389e-06	0.00011363	3.94451
BRCA	3p	0.134654	0.375638	0.72007	0.849424	0.0708754			BRCA	3p	0.529929	0.096118	4.41931e-08	1.60227e-06	5.79527
BRCA	3q	0.575266	0.0963745	3.24619e-09	1.96769e-07	6.70604			BRCA	3q	0.412514	0.481187	0.391493	0.559798	0.251969
BRCA	4p	0.294349	0.218643	0.178524	0.367303	0.434976			BRCA	4p	0.552948	0.109353	5.03018e-07	1.37432e-05	4.86191
BRCA	4q	0.760956	0.25285	0.00267945	0.0195501	1.70885			BRCA	4q	0.486247	0.165935	0.00345839	0.020832	1.68127
BRCA	5p	0.444261	0.0736358	2.22087e-09	1.45837e-07	6.83613			BRCA	5p	0.498416	0.217071	0.0218821	0.082058	1.08588
BRCA	5q	0.661379	0.34249	0.0537564	0.170121	0.769243			BRCA	5q	0.698919	0.0950678	3.89806e-13	4.97003e-11	10.3036
BRCA	6p	0.432271	0.0942076	5.00002e-06	0.000145926	3.83587			BRCA	6p	0.454224	0.240971	0.059722	0.161739	0.791186
BRCA	6q	0.24309	0.180922	0.179386	0.368115	0.434016			BRCA	6q	0.131486	0.087195	0.131865	0.267577	0.57255
BRCA	7p	0.199597	0.0988051	0.0436269	0.15221	0.817558			BRCA	7p	0.854784	0.177666	1.73019e-06	3.78171e-05	4.42231
BRCA	7q	0.719087	0.168678	2.20156e-05	0.000471535	3.32649			BRCA	7q	0.0231853	0.136636	0.865289	0.90802	0.0419048
BRCA	8p	0.291744	0.0671198	1.56513e-05	0.000373735	3.42744			BRCA	8p	0.339429	0.0520267	1.09109e-10	8.34681e-09	8.07848
BRCA	8q	0.285144	0.0360687	6.65382e-15	2.62161e-12	11.5814			BRCA	8q	0.229553	0.322769	0.477175	0.638647	0.194739
BRCA	9p	0.642628	0.11913	8.59311e-08	3.76187e-06	5.4246			BRCA	9p	0.358166	0.0975346	0.000252812	0.0023024	2.63782
BRCA	9q	0.498081	0.188438	0.00833628	0.045618	1.34086			BRCA	9q	0.561242	0.152706	0.000249594	0.00230047	2.63818
CESC	10p	0.270784	0.186395	0.147474	0.331082	0.480064			CESC	10p	0.23581	0.191124	0.218352	0.373803	0.427357
CESC	10q	0.968241	0.357946	0.00727316	0.0409375	1.38788			CESC	10q	0.0581921	0.175676	0.740713	0.833716	0.0789817
CESC	11p	0.0459643	0.303098	0.879583	0.937905	0.0278413			CESC	11p	-0.0556695	0.132981	0.67582	0.783985	0.105692
CESC	11q	1.46104	0.522363	0.00556947	0.034458	1.46271			CESC	11q	0.014774	0.100258	0.882957	0.918996	0.0366864
CESC	12p	-0.189882	0.124185	0.127511	0.306337	0.513801			CESC	12p	-0.0380473	0.116676	0.744611	0.833716	0.0789817
CESC	12q	0.24278	0.243344	0.319322	0.540791	0.266971			CESC	12q	-0.285988	0.374909	0.44624	0.612751	0.212716
CESC	13q	0.104462	0.0963958	0.279658	0.491898	0.308125			CESC	13q	0.130231	0.0797019	0.103559	0.23608	0.62694
CESC	14q	0.0603043	0.0762576	0.429803	0.636626	0.196116			CESC	14q	-0.189336	0.12091	0.118694	0.256134	0.591532
CESC	15q	0.180298	0.0896022	0.0452797	0.154461	0.811182			CESC	15q	-0.0210095	0.111289	0.850422	0.903414	0.0441131
CESC	16p	0.09029	0.170079	0.595947	0.764831	0.116435			CESC	16p	0.400727	0.215059	0.0635251	0.169326	0.771275
CESC	16q	0.403004	0.232723	0.0845113	0.231232	0.635951			CESC	16q	-0.246172	0.148546	0.0986436	0.227983	0.642098
CESC	17p	0.0796084	0.535138	0.881875	0.938091	0.0277551			CESC	17p	0.162802	0.079917	0.0426004	0.12935	0.888233
CESC	17q	0.0787016	0.123924	0.525909	0.710834	0.148232			CESC	17q	0.694911	0.361965	0.0559818	0.154607	0.810772
CESC	18p	-0.0420937	0.104176	0.686488	0.830956	0.0804217			CESC	18p	0.215917	0.237375	0.363878	0.531235	0.274714
CESC	18q	-0.144385	0.518348	0.780822	0.88024	0.0553987			CESC	18q	-0.0838626	0.110112	0.446948	0.612751	0.212716
CESC	19p	0.0186163	0.201033	0.926293	0.96339	0.016198			CESC	19p	0.117567	0.115081	0.307886	0.474864	0.323431
CESC	19q	0.13546	0.0930892	0.146777	0.331082	0.480064			CESC	19q	0.0442196	0.38121	0.907751	0.936929	0.0282931
CESC	1p	0.136962	0.183139	0.455195	0.659363	0.180875			CESC	1p	0.0828054	0.310417	0.789863	0.865172	0.0628976
CESC	1q	0.0649546	0.0665265	0.329751	0.544746	0.263806			CESC	1q	0.412573	0.308388	0.182277	0.335072	0.474862
CESC	20p	0.061752	0.107941	0.567759	0.738274	0.131783			CESC	20p	-0.0383155	0.135251	0.777175	0.855451	0.0678047
CESC	20q	-0.204681	0.0945409	0.031264	0.116758	0.932712			CESC	20q	-0.0787158	0.247739	0.750951	0.834996	0.0783155
CESC	21q	0.230771	0.1159	0.0476149	0.15699	0.804129			CESC	21q	0.200028	0.0940129	0.0343283	0.113685	0.944299
CESC	22q	0.252356	0.128814	0.051291	0.166326	0.779039			CESC	22q	-0.104891	0.0872721	0.230519	0.385037	0.414497
CESC	2p	0.0861787	0.0921002	0.350252	0.564414	0.248403			CESC	2p	-0.915	0.512562	0.0754688	0.190749	0.719538
CESC	2q	0.257103	0.382724	0.502322	0.696257	0.15723			CESC	2q	0.117827	0.156407	0.4519	0.618432	0.208708
CESC	3p	0.140509	0.142118	0.323932	0.54195	0.266041			CESC	3p	0.219403	0.0774698	0.00498323	0.0268463	1.57112
CESC	3q	0.135922	0.0410969	0.00106814	0.0103736	1.98407			CESC	3q	0.587497	0.515363	0.255952	0.414007	0.382992
CESC	4p	NA	NA	NA	NA	NA			CESC	4p	0.230701	0.0870683	0.00852548	0.0402592	1.39513
CESC	4q	0.194862	0.239411	0.416439	0.623867	0.204908			CESC	4q	0.237359	0.135695	0.0813954	0.201513	0.695697
CESC	5p	0.0722801	0.0466183	0.122188	0.298093	0.525648			CESC	5p	0.365779	0.546983	0.504449	0.659664	0.180677
CESC	5q	-0.0684808	0.111827	0.540834	0.71868	0.143464			CESC	5q	0.254136	0.118715	0.033216	0.110962	0.954827
CESC	6p	-0.0934534	0.116663	0.423797	0.62907	0.201301			CESC	6p	-0.377406	0.530557	0.477524	0.638647	0.194739
CESC	6q	-0.422447	0.369247	0.253673	0.458538	0.338624			CESC	6q	-0.114192	0.121345	0.347512	0.515207	0.288018
CESC	7p	0.136804	0.169374	0.419973	0.627967	0.202063			CESC	7p	0.231202	0.266271	0.386012	0.554033	0.256465
CESC	7q	-0.0100552	0.243634	0.967112	0.983333	0.00729956			CESC	7q	0.17325	0.135581	0.20241	0.356782	0.447597
CESC	8p	0.275563	0.302762	0.363686	0.58005	0.236535			CESC	8p	0.138156	0.0854238	0.106978	0.240815	0.618316
CESC	8q	0.174391	0.070677	0.01422	0.0663038	1.17846			CESC	8q	NA	NA	NA	NA	NA
CESC	9p	-0.150329	0.192683	0.43598	0.643357	0.191548			CESC	9p	0.0595526	0.169687	0.725899	0.823907	0.084122
CESC	9q	0.000869149	0.152987	0.995471	0.998004	0.000867565			CESC	9q	0.0737358	0.179594	0.681721	0.786886	0.104088
COAD	10p	0.191731	0.136363	0.160381	0.342494	0.465347			COAD	10p	-0.219116	0.271881	0.420705	0.591433	0.228095
COAD	10q	-0.0865552	0.335303	0.796413	0.891439	0.0499084			COAD	10q	-0.193898	0.271353	0.475237	0.638002	0.195178
COAD	11p	0.0402013	0.141841	0.776977	0.878362	0.0563264			COAD	11p	-0.146549	0.332143	0.659259	0.775897	0.110196
COAD	11q	-0.111561	0.177304	0.529526	0.711598	0.147765			COAD	11q	0.117295	0.142382	0.410475	0.581506	0.235446
COAD	12p	-0.0145681	0.125676	0.907768	0.955691	0.0196823			COAD	12p	-0.259153	0.166208	0.119633	0.257077	0.589937
COAD	12q	0.336298	0.234911	0.152933	0.335719	0.474024			COAD	12q	0.285816	0.209576	0.173295	0.324134	0.489275
COAD	13q	0.020354	0.0285432	0.476148	0.677374	0.169171			COAD	13q	-0.159565	0.181777	0.381065	0.550028	0.259615
COAD	14q	-0.0435388	0.112373	0.698661	0.832896	0.079409			COAD	14q	-0.0290847	0.049619	0.558061	0.711406	0.147882
COAD	15q	0.242967	0.149565	0.105217	0.265938	0.57522			COAD	15q	-0.0537863	0.0471081	0.254149	0.413668	0.383348
COAD	16p	-0.0318358	0.149621	0.831595	0.91331	0.039382			COAD	16p	0.276595	0.210785	0.190098	0.344609	0.462673
COAD	16q	-0.222791	0.332144	0.502701	0.696257	0.15723			COAD	16q	0.188545	0.270609	0.486309	0.641128	0.193055
COAD	17p	-0.254603	0.271491	0.349058	0.563642	0.248996			COAD	17p	0.0900759	0.0457011	0.0493179	0.14237	0.84658
COAD	17q	0.0813995	0.0654552	0.214277	0.417946	0.37888			COAD	17q	0.398656	0.237364	0.0937984	0.221472	0.654681
COAD	18p	-0.102138	0.147671	0.489503	0.687572	0.162682			COAD	18p	-0.0149868	0.117633	0.898676	0.930294	0.0313797
COAD	18q	-1.09002	0.470268	0.0209117	0.0858252	1.06639			COAD	18q	0.0281806	0.0872499	0.746849	0.833716	0.0789817
COAD	19p	0.142073	0.148974	0.340746	0.553624	0.256785			COAD	19p	0.0982009	0.190652	0.606744	0.745038	0.127821
COAD	19q	0.0280969	0.0926195	0.761751	0.867428	0.0617667			COAD	19q	NA	NA	NA	NA	NA
COAD	1p	NA	NA	NA	NA	NA			COAD	1p	-0.000658878	0.0770136	0.993178	0.994478	0.00240503
COAD	1q	-0.0309093	0.0559331	0.580792	0.751501	0.12407			COAD	1q	NA	NA	NA	NA	NA
COAD	20p	-0.0386792	0.0462867	0.403807	0.61361	0.212107			COAD	20p	0.0864837	0.0943802	0.360013	0.528457	0.276991
COAD	20q	0.000566369	0.0289692	0.98441	0.992144	0.0034255			COAD	20q	NA	NA	NA	NA	NA
COAD	21q	-0.0627736	0.123359	0.611153	0.773015	0.111812			COAD	21q	0.104913	0.0513298	0.0415405	0.128139	0.892319
COAD	22q	0.0960761	0.154981	0.535708	0.714277	0.146133			COAD	22q	0.0885462	0.0503961	0.0795782	0.198422	0.70241
COAD	2p	0.22039	0.192149	0.251977	0.458029	0.339107			COAD	2p	NA	NA	NA	NA	NA
COAD	2q	-0.00247753	0.234137	0.991562	0.997438	0.00111409			COAD	2q	-0.0117562	0.271793	0.965518	0.974087	0.0114021
COAD	3p	0.400523	0.332106	0.228447	0.439064	0.357472			COAD	3p	0.0795815	0.109096	0.466083	0.632187	0.199154
COAD	3q	0.31361	0.113883	0.00611973	0.0368118	1.43401			COAD	3q	NA	NA	NA	NA	NA
COAD	4p	0.212252	0.193927	0.27433	0.486387	0.313018			COAD	4p	0.0446243	0.0979778	0.648995	0.774404	0.111033
COAD	4q	0.344507	0.177097	0.052352	0.169071	0.77193			COAD	4q	0.048257	0.136173	0.723215	0.82329	0.0844473
COAD	5p	0.0119037	0.0726247	0.869876	0.931334	0.0308945			COAD	5p	0.362597	0.210148	0.0851558	0.207466	0.683054
COAD	5q	-0.136206	0.235868	0.563909	0.735696	0.133302			COAD	5q	-0.215048	0.144335	0.136924	0.276376	0.558499
COAD	6p	0.131253	0.125928	0.297815	0.515776	0.287539			COAD	6p	NA	NA	NA	NA	NA
COAD	6q	0.62953	0.211121	0.0030182	0.0212019	1.67362			COAD	6q	0.135795	0.135662	0.317359	0.48556	0.313757
COAD	7p	0.113458	0.0505062	0.0251418	0.098566	1.00627			COAD	7p	NA	NA	NA	NA	NA
COAD	7q	0.0263725	0.127611	0.836363	0.913422	0.0393285			COAD	7q	0.273909	0.333076	0.411301	0.581599	0.235376
COAD	8p	0.108765	0.0771307	0.159338	0.341191	0.467003			COAD	8p	0.104851	0.0477795	0.0287233	0.100335	0.998549
COAD	8q	0.075516	0.0342669	0.0280286	0.107739	0.967626			COAD	8q	0.175981	0.334904	0.599594	0.743268	0.128855
COAD	9p	0.00858378	0.112364	0.93914	0.969528	0.0134398			COAD	9p	0.272971	0.209376	0.192979	0.347363	0.459217
COAD	9q	-0.330213	0.190549	0.0837692	0.23	0.638271			COAD	9q	-0.21325	0.191654	0.26642	0.423856	0.372782
ESCA	10p	0.194433	0.168273	0.249713	0.458029	0.339107			ESCA	10p	0.299943	0.194821	0.125741	0.262819	0.580343
ESCA	10q	-0.0338615	0.449136	0.939999	0.969528	0.0134398			ESCA	10q	0.353993	0.240849	0.143563	0.284523	0.545882
ESCA	11p	0.230129	0.262796	0.382543	0.594698	0.225703			ESCA	11p	-0.324925	0.229623	0.159026	0.306435	0.513662
ESCA	11q	0.000681232	0.268091	0.997976	0.998959	0.000452158			ESCA	11q	0.578898	0.174044	0.00109504	0.00790287	2.10221
ESCA	12p	-0.0215054	0.0990893	0.828466	0.912906	0.0395739			ESCA	12p	0.0630212	0.251268	0.802321	0.875572	0.0577082
ESCA	12q	-0.381242	0.370451	0.304944	0.524663	0.280119			ESCA	12q	-0.545251	0.725551	0.45345	0.619445	0.207997
ESCA	13q	-0.201903	0.123842	0.105633	0.265938	0.57522			ESCA	13q	0.198031	0.119581	0.0999684	0.230349	0.637614
ESCA	14q	0.195001	0.130135	0.136317	0.318746	0.496555			ESCA	14q	0.258235	0.133789	0.0556372	0.154327	0.811557
ESCA	15q	-0.0147589	0.165884	0.929232	0.964736	0.0155914			ESCA	15q	0.0463984	0.143921	0.74762	0.833716	0.0789817
ESCA	16p	-0.370742	0.246056	0.133926	0.314088	0.502948			ESCA	16p	0.156511	0.209582	0.456316	0.621411	0.206621
ESCA	16q	0.122962	0.293213	0.675531	0.826203	0.0829134			ESCA	16q	-0.134525	0.230208	0.559804	0.711406	0.147882
ESCA	17p	0.634805	0.373304	0.0914835	0.239049	0.621514			ESCA	17p	-0.19237	0.117227	0.102748	0.235336	0.628312
ESCA	17q	0.0438811	0.217547	0.840395	0.913422	0.0393285			ESCA	17q	NA	NA	NA	NA	NA
ESCA	18p	0.0460966	0.116707	0.693389	0.83151	0.0801323			ESCA	18p	-0.506597	0.290915	0.0837809	0.205424	0.687348
ESCA	18q	-0.173751	0.246039	0.481285	0.679663	0.167706			ESCA	18q	0.0952993	0.122277	0.436935	0.604439	0.218647
ESCA	19p	0.748682	0.368098	0.043654	0.15221	0.817558			ESCA	19p	0.361043	0.227796	0.114941	0.251949	0.598688
ESCA	19q	-0.341462	0.206081	0.0994807	0.255345	0.592873			ESCA	19q	-0.034195	0.365083	0.925496	0.947797	0.0232847
ESCA	1p	0.53584	0.450361	0.236004	0.44856	0.34818			ESCA	1p	-0.122543	0.178327	0.492952	0.646841	0.189203
ESCA	1q	0.150763	0.107111	0.161173	0.343256	0.464382			ESCA	1q	-0.314546	0.647693	0.628021	0.761486	0.118338
ESCA	20p	0.115405	0.143532	0.422621	0.62907	0.201301			ESCA	20p	-0.367516	0.198382	0.0659225	0.173899	0.759703
ESCA	20q	-0.208185	0.119138	0.082445	0.227156	0.643676			ESCA	20q	0.44732	0.642168	0.487213	0.641128	0.193055
ESCA	21q	0.199951	0.248929	0.423903	0.62907	0.201301			ESCA	21q	0.0970459	0.0956831	0.312037	0.479335	0.319361
ESCA	22q	0.392006	0.156322	0.0134236	0.0633399	1.19832			ESCA	22q	0.0819926	0.117408	0.486089	0.641128	0.193055
ESCA	2p	-0.109146	0.261548	0.677003	0.826203	0.0829134			ESCA	2p	-1.29817	0.73112	0.0777249	0.195591	0.708652
ESCA	2q	-0.286125	0.634889	0.652842	0.807598	0.0928049			ESCA	2q	0.250704	0.287535	0.38454	0.553999	0.256491
ESCA	3p	0.439653	0.254297	0.086511	0.233146	0.632372			ESCA	3p	0.29939	0.10945	0.00694779	0.0350848	1.45488
ESCA	3q	0.152269	0.0864627	0.0800984	0.222245	0.653169			ESCA	3q	0.495468	0.64253	0.442231	0.610661	0.2142
ESCA	4p	0.487771	0.205474	0.0189217	0.0797343	1.09835			ESCA	4p	0.313151	0.151655	0.0405774	0.126334	0.898479
ESCA	4q	0.234978	0.369145	0.525353	0.710834	0.148232			ESCA	4q	0.391774	0.231141	0.092016	0.219291	0.65898
ESCA	5p	0.202432	0.0812439	0.0137409	0.0644513	1.19077			ESCA	5p	0.012077	0.286523	0.966447	0.974087	0.0114021
ESCA	5q	0.220678	0.265361	0.407085	0.61361	0.212107			ESCA	5q	0.1673	0.133178	0.210859	0.365215	0.437452
ESCA	6p	-0.094259	0.22609	0.677319	0.826203	0.0829134			ESCA	6p	0.10336	0.232816	0.657692	0.775726	0.110292
ESCA	6q	0.373729	0.37718	0.323304	0.54195	0.266041			ESCA	6q	-0.179914	0.217179	0.408664	0.580015	0.23656
ESCA	7p	-0.0267828	0.0975934	0.784104	0.882677	0.054198			ESCA	7p	0.838738	0.377879	0.0281796	0.0989063	1.00478
ESCA	7q	0.0774934	0.203847	0.704347	0.838179	0.0766632			ESCA	7q	0.264709	0.242723	0.277128	0.435831	0.360681
ESCA	8p	0.436532	0.211108	0.0405815	0.1434	0.84345			ESCA	8p	0.420934	0.119317	0.000548743	0.00441882	2.35469
ESCA	8q	0.167273	0.0836082	0.0470872	0.15651	0.805458			ESCA	8q	0.464893	0.642322	0.470616	0.63384	0.19802
ESCA	9p	0.561538	0.230258	0.01611	0.0717215	1.14435			ESCA	9p	0.211353	0.11628	0.0710049	0.183509	0.736342
ESCA	9q	0.117491	0.132727	0.377374	0.590022	0.229132			ESCA	9q	0.605216	0.31384	0.0556789	0.154327	0.811557
HNSC	10p	0.0404617	0.109411	0.711696	0.843334	0.0740006			HNSC	10p	0.0961486	0.073238	0.189868	0.344609	0.462673
HNSC	10q	0.147617	0.225992	0.513942	0.704697	0.151998			HNSC	10q	0.0513324	0.121354	0.672481	0.781836	0.106884
HNSC	11p	0.232631	0.105419	0.0278084	0.107417	0.968928			HNSC	11p	0.233303	0.108543	0.0320945	0.108638	0.964016
HNSC	11q	0.0225509	0.0992748	0.820407	0.906705	0.0425339			HNSC	11q	0.104943	0.0719772	0.145489	0.286853	0.54234
HNSC	12p	0.0988436	0.0516462	0.0562252	0.17512	0.756664			HNSC	12p	0.228206	0.136279	0.094737	0.221472	0.654681
HNSC	12q	0.246836	0.193442	0.202549	0.403053	0.394638			HNSC	12q	0.231012	0.17927	0.198128	0.352201	0.453209
HNSC	13q	-0.0405975	0.0924541	0.660829	0.814919	0.0888858			HNSC	13q	0.122712	0.0553716	0.027163	0.0971012	1.01278
HNSC	14q	0.0990093	0.0510641	0.053122	0.169659	0.770424			HNSC	14q	0.154936	0.0856711	0.0712825	0.183606	0.736112
HNSC	15q	0.0979675	0.0878162	0.265195	0.47418	0.324057			HNSC	15q	0.11772	0.0739417	0.112052	0.247744	0.605997
HNSC	16p	-0.144362	0.136696	0.291452	0.505869	0.295962			HNSC	16p	0.191973	0.181201	0.289924	0.454492	0.342474
HNSC	16q	0.241302	0.124757	0.053685	0.170121	0.769243			HNSC	16q	0.117873	0.103436	0.255023	0.414007	0.382992
HNSC	17p	-0.126739	0.118518	0.285482	0.497699	0.303033			HNSC	17p	0.181638	0.0725661	0.0126408	0.0546339	1.26254
HNSC	17q	0.183552	0.120438	0.128132	0.306893	0.513013			HNSC	17q	-0.479828	0.502562	0.340175	0.507279	0.294753
HNSC	18p	0.0634082	0.0496205	0.201895	0.402768	0.394945			HNSC	18p	0.349449	0.254465	0.170376	0.320033	0.494805
HNSC	18q	-0.00904856	0.159457	0.954776	0.977776	0.00976085			HNSC	18q	0.11192	0.05754	0.0523386	0.147738	0.830508
HNSC	19p	0.123008	0.256868	0.632246	0.794593	0.0998551			HNSC	19p	0.0198341	0.1047	0.849827	0.903414	0.0441131
HNSC	19q	-0.115885	0.125707	0.357057	0.574206	0.240932			HNSC	19q	0.294316	0.136733	0.0318537	0.108303	0.965361
HNSC	1p	0.071085	0.207689	0.732301	0.856162	0.0674443			HNSC	1p	0.216833	0.107617	0.0444607	0.133536	0.874401
HNSC	1q	0.136249	0.0739724	0.0660837	0.195109	0.709722			HNSC	1q	NA	NA	NA	NA	NA
HNSC	20p	0.0705193	0.0847224	0.405619	0.61361	0.212107			HNSC	20p	0.248762	0.119919	0.0385757	0.122496	0.911877
HNSC	20q	0.162174	0.0708344	0.02247	0.0901835	1.04487			HNSC	20q	0.394424	0.292205	0.177732	0.330316	0.48107
HNSC	21q	-0.0268919	0.139392	0.847119	0.916934	0.0376621			HNSC	21q	0.121289	0.0549701	0.0278186	0.0985242	1.00646
HNSC	22q	0.0719881	0.0636282	0.258483	0.465034	0.332515			HNSC	22q	0.263172	0.0834758	0.00173082	0.0119287	1.92341
HNSC	2p	0.055741	0.106518	0.601	0.766323	0.115588			HNSC	2p	-0.409689	0.206802	0.0481516	0.141134	0.850368
HNSC	2q	0.437075	0.377118	0.247029	0.457041	0.340045			HNSC	2q	0.223197	0.140834	0.113642	0.250537	0.601128
HNSC	3p	0.1334	0.0930749	0.15278	0.335719	0.474024			HNSC	3p	0.0590611	0.0477437	0.216684	0.373803	0.427357
HNSC	3q	0.0688243	0.0362528	0.0582143	0.178494	0.748377			HNSC	3q	0.257893	0.368456	0.484467	0.641128	0.193055
HNSC	4p	-0.333485	0.160791	0.0386566	0.138385	0.858911			HNSC	4p	0.211812	0.0697754	0.00252813	0.0159836	1.79632
HNSC	4q	0.00717601	0.259687	0.977966	0.990536	0.0041296			HNSC	4q	0.0884159	0.125624	0.481877	0.639994	0.193824
HNSC	5p	0.0984268	0.0412339	0.0173561	0.0755615	1.1217			HNSC	5p	0.455764	0.505983	0.368284	0.535622	0.271142
HNSC	5q	0.162264	0.147226	0.271029	0.482101	0.316862			HNSC	5q	0.111708	0.0607927	0.0667384	0.175013	0.756931
HNSC	6p	-0.00876714	0.105414	0.933752	0.968153	0.0140559			HNSC	6p	0.319671	0.149584	0.0330948	0.110962	0.954827
HNSC	6q	-0.0934632	0.153203	0.542106	0.719145	0.143183			HNSC	6q	-0.0168155	0.143334	0.906657	0.936929	0.0282931
HNSC	7p	-0.0202235	0.0673424	0.764069	0.868812	0.0610744			HNSC	7p	0.201382	0.155568	0.196143	0.350177	0.455712
HNSC	7q	0.123684	0.105509	0.241663	0.453406	0.343513			HNSC	7q	0.13172	0.153074	0.389934	0.558614	0.252888
HNSC	8p	0.0222105	0.0938721	0.813082	0.90092	0.0453139			HNSC	8p	0.141794	0.0600424	0.0186025	0.0715123	1.14562
HNSC	8q	0.0551467	0.0384276	0.151891	0.335719	0.474024			HNSC	8q	0.562661	0.517216	0.277451	0.435831	0.360681
HNSC	9p	0.0815422	0.106201	0.443044	0.650128	0.187001			HNSC	9p	0.144094	0.0579217	0.0131938	0.0560404	1.2515
HNSC	9q	0.214585	0.0750818	0.0044412	0.0284526	1.54588			HNSC	9q	0.520553	0.504303	0.302509	0.470364	0.327566
KIRC	10p	0.221075	0.254813	0.385981	0.595212	0.225329			KIRC	10p	1.42717	0.508152	0.00514795	0.0273485	1.56307
KIRC	10q	NA	NA	NA	NA	NA			KIRC	10q	-0.339087	0.129067	0.00883994	0.0412351	1.38473
KIRC	11p	1.18415	0.510419	0.0206953	0.0853816	1.06864			KIRC	11p	NA	NA	NA	NA	NA
KIRC	11q	NA	NA	NA	NA	NA			KIRC	11q	0.879415	0.254519	0.000590706	0.00465866	2.33174
KIRC	12p	1.08157	0.251856	2.05911e-05	0.000463594	3.33386			KIRC	12p	-0.0328016	0.507753	0.948514	0.964556	0.0156727
KIRC	12q	1.39333	0.358122	0.000111752	0.00169347	2.77122			KIRC	12q	NA	NA	NA	NA	NA
KIRC	13q	-0.0193567	0.0974386	0.84261	0.914568	0.0387839			KIRC	13q	0.569987	0.0736125	4.62789e-14	8.85084e-12	11.053
KIRC	14q	0.539813	0.141436	0.000158054	0.00222405	2.65286			KIRC	14q	0.220016	0.0429341	4.11062e-07	1.16468e-05	4.9338
KIRC	15q	-0.00823487	0.107115	0.938748	0.969528	0.0134398			KIRC	15q	0.438971	0.101414	1.78217e-05	0.000235063	3.62882
KIRC	16p	0.0844292	0.168712	0.616963	0.777867	0.109095			KIRC	16p	2.35601	0.500433	3.15553e-06	5.74758e-05	4.24051
KIRC	16q	NA	NA	NA	NA	NA			KIRC	16q	-0.177967	0.181974	0.328498	0.497625	0.303098
KIRC	17p	1.91509	0.275282	9.81905e-12	1.28957e-09	8.88956			KIRC	17p	0.634913	0.12603	6.33659e-07	1.67155e-05	4.77688
KIRC	17q	0.567459	0.153275	0.000234444	0.00302856	2.51876			KIRC	17q	NA	NA	NA	NA	NA
KIRC	18p	0.355779	0.360965	0.324733	0.54214	0.265889			KIRC	18p	0.731801	0.29478	0.0133325	0.0560404	1.2515
KIRC	18q	0.694408	0.51088	0.174615	0.363051	0.440032			KIRC	18q	0.148078	0.194258	0.446213	0.612751	0.212716
KIRC	19p	NA	NA	NA	NA	NA			KIRC	19p	1.21744	0.291505	3.42491e-05	0.000407549	3.38982
KIRC	19q	0.563104	0.30075	0.0616715	0.185169	0.732432			KIRC	19q	NA	NA	NA	NA	NA
KIRC	1p	0.29322	0.496412	0.554976	0.726131	0.138985			KIRC	1p	0.38098	0.129437	0.00337882	0.0206305	1.68549
KIRC	1q	0.163067	0.0774693	0.0357345	0.131583	0.880799			KIRC	1q	2.37542	0.505221	3.28621e-06	5.76743e-05	4.23902
KIRC	20p	1.31436	0.290332	7.2944e-06	0.000205285	3.68764			KIRC	20p	-0.0804308	0.227636	0.723972	0.82329	0.0844473
KIRC	20q	1.06809	0.171002	8.2274e-10	5.89381e-08	7.2296			KIRC	20q	NA	NA	NA	NA	NA
KIRC	21q	0.187867	0.075518	0.013163	0.0624845	1.20423			KIRC	21q	0.0782032	0.0813212	0.336663	0.505401	0.296364
KIRC	22q	0.0613883	0.0835924	0.463029	0.663395	0.178228			KIRC	22q	0.620128	0.126034	1.14897e-06	2.69983e-05	4.56866
KIRC	2p	0.322641	0.510827	0.527897	0.711598	0.147765			KIRC	2p	NA	NA	NA	NA	NA
KIRC	2q	-0.203979	0.291857	0.484899	0.682322	0.16601			KIRC	2q	2.35594	0.502203	3.40654e-06	5.79112e-05	4.23724
KIRC	3p	1.66993	0.398408	3.66964e-05	0.000658307	3.18157			KIRC	3p	-0.0508684	0.0419004	0.22524	0.379534	0.420749
KIRC	3q	0.318414	0.0905561	0.000472713	0.00510271	2.2922			KIRC	3q	-0.162188	0.29664	0.584775	0.732169	0.135388
KIRC	4p	0.673288	0.358133	0.0606259	0.183039	0.737456			KIRC	4p	0.279073	0.170602	0.102432	0.235317	0.628347
KIRC	4q	0.200436	0.50978	0.694332	0.83151	0.0801323			KIRC	4q	0.836376	0.294088	0.00461555	0.0256975	1.59011
KIRC	5p	0.0872568	0.115439	0.450041	0.657291	0.182242			KIRC	5p	0.51045	0.513109	0.320255	0.489013	0.31068
KIRC	5q	-0.217383	0.0917867	0.0182002	0.0779445	1.10821			KIRC	5q	1.51416	0.514617	0.00339796	0.0206305	1.68549
KIRC	6p	0.188273	0.508512	0.71134	0.843334	0.0740006			KIRC	6p	0.829942	0.295087	0.00508469	0.0272013	1.56541
KIRC	6q	0.314739	0.185797	0.0908457	0.239049	0.621514			KIRC	6q	-0.136439	0.0905195	0.132292	0.267734	0.572297
KIRC	7p	0.0730888	0.182124	0.688339	0.83151	0.0801323			KIRC	7p	NA	NA	NA	NA	NA
KIRC	7q	0.247701	0.15473	0.109961	0.273341	0.563295			KIRC	7q	NA	NA	NA	NA	NA
KIRC	8p	0.10276	0.345068	0.765984	0.869733	0.0606138			KIRC	8p	0.293872	0.0623717	3.09264e-06	5.74758e-05	4.24051
KIRC	8q	0.321751	0.103397	0.0019528	0.015864	1.79959			KIRC	8q	0.816801	0.369483	0.0274687	0.0977374	1.00994
KIRC	9p	-0.300695	0.296278	0.310583	0.532042	0.274054			KIRC	9p	-0.11963	0.256767	0.641459	0.769148	0.11399
KIRC	9q	1.67573	0.355285	3.02465e-06	0.000103627	3.98453			KIRC	9q	0.294095	0.224712	0.191144	0.344871	0.462343
KIRP	10p	0.861281	0.414816	0.0387567	0.138385	0.858911			KIRP	10p	0.387907	0.226916	0.0884402	0.214783	0.667999
KIRP	10q	NA	NA	NA	NA	NA			KIRP	10q	1.45226	0.239105	3.91324e-09	1.76096e-07	6.75425
KIRP	11p	0.454557	0.512428	0.375792	0.589854	0.229255			KIRP	11p	0.949681	0.243524	0.000119801	0.00122197	2.91294
KIRP	11q	NA	NA	NA	NA	NA			KIRP	11q	0.817304	0.175673	4.99442e-06	7.79741e-05	4.10805
KIRP	12p	0.586626	0.224091	0.00931452	0.0492607	1.3075			KIRP	12p	NA	NA	NA	NA	NA
KIRP	12q	1.38283	0.383115	0.000361369	0.00412694	2.38437			KIRP	12q	NA	NA	NA	NA	NA
KIRP	13q	-0.0586292	0.0934298	0.530848	0.711598	0.147765			KIRP	13q	0.827905	0.128965	6.31031e-10	3.44813e-08	7.46242
KIRP	14q	0.72964	0.310388	0.0195363	0.0818862	1.08679			KIRP	14q	0.616435	0.0820385	7.27454e-13	7.95003e-11	10.0996
KIRP	15q	0.143356	0.311454	0.645695	0.802536	0.0955354			KIRP	15q	0.327308	0.114674	0.00462806	0.0256975	1.59011
KIRP	16p	0.900765	0.140297	5.53961e-10	4.36522e-08	7.35999			KIRP	16p	NA	NA	NA	NA	NA
KIRP	16q	1.15187	0.373012	0.0022128	0.0172642	1.76285			KIRP	16q	1.28246	0.25817	1.16463e-06	2.69983e-05	4.56866
KIRP	17p	NA	NA	NA	NA	NA			KIRP	17p	1.65812	0.174965	9.75544e-19	3.73146e-16	15.4281
KIRP	17q	0.595575	0.118356	8.52666e-07	3.3595e-05	4.47372			KIRP	17q	NA	NA	NA	NA	NA
KIRP	18p	1.14103	0.154463	1.61726e-12	3.18601e-10	9.49675			KIRP	18p	0.611608	0.494687	0.217345	0.373803	0.427357
KIRP	18q	1.86261	0.525115	0.00045507	0.00498049	2.30273			KIRP	18q	0.769175	0.204451	0.000203962	0.00192631	2.71527
KIRP	19p	NA	NA	NA	NA	NA			KIRP	19p	0.14517	0.32048	0.650904	0.774404	0.111033
KIRP	19q	NA	NA	NA	NA	NA			KIRP	19q	0.663933	0.395055	0.0939154	0.221472	0.654681
KIRP	1p	1.98754	0.355079	5.21456e-08	2.4171e-06	5.61671			KIRP	1p	0.730328	0.151222	2.22642e-06	4.48214e-05	4.34851
KIRP	1q	0.883521	0.132815	1.44305e-10	1.26347e-08	7.89843			KIRP	1q	-0.215184	0.501894	0.668439	0.781595	0.107018
KIRP	20p	-0.274162	0.391107	0.483872	0.682095	0.166155			KIRP	20p	NA	NA	NA	NA	NA
KIRP	20q	0.627243	0.206691	0.00262622	0.0195232	1.70945			KIRP	20q	NA	NA	NA	NA	NA
KIRP	21q	-0.211313	0.147082	0.152044	0.335719	0.474024			KIRP	21q	0.0427453	0.0994294	0.667602	0.781595	0.107018
KIRP	22q	0.0218063	0.27638	0.937178	0.969528	0.0134398			KIRP	22q	0.590655	0.0795645	1.30282e-12	1.24583e-10	9.90454
KIRP	2p	NA	NA	NA	NA	NA			KIRP	2p	0.700555	0.389167	0.0728781	0.185839	0.730862
KIRP	2q	0.110508	0.278357	0.691661	0.83151	0.0801323			KIRP	2q	0.126196	0.552515	0.819497	0.888213	0.051483
KIRP	3p	0.389636	0.550179	0.479417	0.678241	0.168616			KIRP	3p	0.549287	0.154502	0.000441062	0.00374903	2.42608
KIRP	3q	0.0212526	0.131968	0.872171	0.932525	0.0303395			KIRP	3q	NA	NA	NA	NA	NA
KIRP	4p	2.53345	0.366693	3.1348e-11	3.08778e-09	8.51035			KIRP	4p	0.74126	0.380756	0.0525291	0.147738	0.830508
KIRP	4q	NA	NA	NA	NA	NA			KIRP	4q	0.652781	0.324346	0.0450803	0.134188	0.872285
KIRP	5p	0.819413	0.219254	0.000224182	0.00294426	2.53102			KIRP	5p	1.34189	0.528039	0.0115711	0.050295	1.29848
KIRP	5q	0.986048	0.234703	3.5474e-05	0.000658307	3.18157			KIRP	5q	1.23393	0.304327	6.46908e-05	0.000706978	3.15059
KIRP	6p	0.138032	0.138507	0.319808	0.540791	0.266971			KIRP	6p	0.839344	0.55113	0.128876	0.26361	0.579038
KIRP	6q	0.199866	0.279724	0.475501	0.677374	0.169171			KIRP	6q	0.327243	0.212513	0.124685	0.262637	0.580645
KIRP	7p	-0.0890291	0.27585	0.747121	0.861978	0.0645036			KIRP	7p	NA	NA	NA	NA	NA
KIRP	7q	-0.0890291	0.27585	0.747121	0.861978	0.0645036			KIRP	7q	NA	NA	NA	NA	NA
KIRP	8p	-0.968632	0.525071	0.0661093	0.195109	0.709722			KIRP	8p	0.888774	0.189019	3.99426e-06	6.5013e-05	4.187
KIRP	8q	0.884528	0.15658	3.86167e-08	2.02866e-06	5.69279			KIRP	8q	1.36908	0.503664	0.0069711	0.0350848	1.45488
KIRP	9p	1.87607	0.364131	4.84535e-07	2.00954e-05	4.6969			KIRP	9p	0.861001	0.184441	4.6642e-06	7.43358e-05	4.1288
KIRP	9q	NA	NA	NA	NA	NA			KIRP	9q	0.603967	0.249655	0.0161699	0.0640931	1.19319
LGG	10p	0.0300999	0.0662741	0.649894	0.806482	0.0934053			LGG	10p	0.280243	0.504376	0.578733	0.72698	0.138477
LGG	10q	NA	NA	NA	NA	NA			LGG	10q	0.468131	0.148165	0.00167192	0.0116274	1.93452
LGG	11p	0.735501	0.202912	0.000320096	0.00376471	2.42427			LGG	11p	0.203685	0.0823844	0.0137414	0.0574435	1.24076
LGG	11q	0.0471283	0.11465	0.681197	0.828369	0.0817763			LGG	11q	1.4405	0.499881	0.00412414	0.0240837	1.61828
LGG	12p	0.265869	0.0955276	0.00557862	0.034458	1.46271			LGG	12p	-0.179291	0.507993	0.72428	0.82329	0.0844473
LGG	12q	0.277026	0.209976	0.187664	0.380152	0.420042			LGG	12q	-0.106407	0.113652	0.349577	0.516267	0.287126
LGG	13q	0.221727	0.188174	0.2393	0.452203	0.344667			LGG	13q	0.148165	0.0622679	0.0176985	0.0687278	1.16287
LGG	14q	0.35558	0.344795	0.302959	0.522388	0.282006			LGG	14q	0.241386	0.0680309	0.000423023	0.00367741	2.43446
LGG	15q	0.830564	0.18973	1.47305e-05	0.000373735	3.42744			LGG	15q	-0.10873	0.0814006	0.182223	0.335072	0.474862
LGG	16p	-0.0750703	0.506099	0.882139	0.938091	0.0277551			LGG	16p	0.801961	0.360193	0.0264093	0.0948502	1.02296
LGG	16q	0.339887	0.257012	0.186605	0.378982	0.421382			LGG	16q	0.0526668	0.171568	0.758987	0.839148	0.0761616
LGG	17p	0.220678	0.510847	0.665932	0.817375	0.0875787			LGG	17p	0.31446	0.257459	0.222488	0.377603	0.422965
LGG	17q	0.1676	0.304863	0.582722	0.751564	0.124034			LGG	17q	NA	NA	NA	NA	NA
LGG	18p	0.281684	0.155384	0.07044	0.204069	0.690223			LGG	18p	-0.0189515	0.192721	0.921703	0.945178	0.0244863
LGG	18q	1.25392	0.282886	1.13712e-05	0.000298684	3.52479			LGG	18q	0.715697	0.25132	0.00457756	0.0256975	1.59011
LGG	19p	0.112385	0.135009	0.405549	0.61361	0.212107			LGG	19p	NA	NA	NA	NA	NA
LGG	19q	0.68425	0.533547	0.200534	0.401068	0.396782			LGG	19q	-0.294779	0.0457773	2.72767e-10	1.89697e-08	7.72194
LGG	1p	-0.274778	0.527881	0.603006	0.766634	0.115412			LGG	1p	-0.243211	0.048408	6.9593e-07	1.77462e-05	4.75089
LGG	1q	-0.0909922	0.174939	0.603189	0.766634	0.115412			LGG	1q	-0.216914	0.521642	0.677708	0.784337	0.105497
LGG	20p	-0.276718	0.253796	0.276081	0.487784	0.311773			LGG	20p	0.756865	0.258536	0.00356719	0.0213195	1.67122
LGG	20q	-0.257969	0.295299	0.382747	0.594698	0.225703			LGG	20q	-0.165561	0.511488	0.746307	0.833716	0.0789817
LGG	21q	0.206804	0.12611	0.101662	0.260096	0.584866			LGG	21q	-0.0636832	0.111959	0.569739	0.720819	0.142174
LGG	22q	0.120824	0.164111	0.461946	0.663048	0.178455			LGG	22q	0.225869	0.0837756	0.00724607	0.0357629	1.44657
LGG	2p	0.259422	0.508849	0.610394	0.773015	0.111812			LGG	2p	0.236313	0.256127	0.356622	0.525657	0.279298
LGG	2q	NA	NA	NA	NA	NA			LGG	2q	-0.084523	0.510627	0.868593	0.908992	0.0414398
LGG	3p	-0.176622	0.509931	0.729211	0.856162	0.0674443			LGG	3p	0.304065	0.162924	0.0625608	0.167926	0.774881
LGG	3q	1.40884	0.502142	0.00521207	0.0328569	1.48337			LGG	3q	0.472564	0.16967	0.00554442	0.0292516	1.53385
LGG	4p	0.225926	0.172614	0.191167	0.383826	0.415866			LGG	4p	-0.177005	0.211351	0.402703	0.573683	0.241328
LGG	4q	NA	NA	NA	NA	NA			LGG	4q	0.349924	0.0999175	0.000501126	0.00412217	2.38487
LGG	5p	0.80062	0.226529	0.000445988	0.00494984	2.30541			LGG	5p	0.220128	0.153706	0.152707	0.29695	0.527316
LGG	5q	NA	NA	NA	NA	NA			LGG	5q	0.244975	0.171154	0.152939	0.29695	0.527316
LGG	6p	0.0740344	0.362138	0.838092	0.913422	0.0393285			LGG	6p	-0.213881	0.512112	0.676379	0.783985	0.105692
LGG	6q	NA	NA	NA	NA	NA			LGG	6q	0.006995	0.0895275	0.937753	0.955234	0.0198902
LGG	7p	0.0465665	0.132481	0.725358	0.854383	0.0683474			LGG	7p	NA	NA	NA	NA	NA
LGG	7q	-0.0808331	0.0856305	0.345619	0.560386	0.251513			LGG	7q	NA	NA	NA	NA	NA
LGG	8p	0.0579444	0.295599	0.844668	0.915541	0.038322			LGG	8p	0.504332	0.25768	0.0508594	0.145177	0.838102
LGG	8q	0.272964	0.12696	0.0320146	0.118998	0.924461			LGG	8q	1.74011	0.501977	0.000571608	0.004555	2.34151
LGG	9p	-0.132779	0.334061	0.691207	0.83151	0.0801323			LGG	9p	0.329451	0.0627517	2.21955e-07	6.80809e-06	5.16697
LGG	9q	0.466914	0.172742	0.00709868	0.0402429	1.39531			LGG	9q	-0.0695604	0.226682	0.759072	0.839148	0.0761616
LIHC	10p	0.193492	0.108276	0.0747784	0.210448	0.676856			LIHC	10p	0.517628	0.268973	0.0551234	0.153903	0.812753
LIHC	10q	0.512007	0.307335	0.0966649	0.249744	0.602505			LIHC	10q	0.297385	0.130749	0.0235275	0.0877979	1.05652
LIHC	11p	0.465538	0.315757	0.141272	0.326458	0.486173			LIHC	11p	0.725775	0.270503	0.00763481	0.0372015	1.42944
LIHC	11q	0.414289	0.357316	0.247081	0.457041	0.340045			LIHC	11q	0.406753	0.16709	0.0154075	0.0620356	1.20736
LIHC	12p	0.557046	0.377412	0.140893	0.326458	0.486173			LIHC	12p	0.135939	0.143819	0.345188	0.512755	0.29009
LIHC	12q	0.362022	0.198432	0.0689132	0.201383	0.695978			LIHC	12q	NA	NA	NA	NA	NA
LIHC	13q	0.369173	0.144135	0.0109866	0.0554967	1.25573			LIHC	13q	0.324806	0.0821251	9.30505e-05	0.000961941	3.01685
LIHC	14q	0.261551	0.16102	0.105454	0.265938	0.57522			LIHC	14q	0.408035	0.0850475	2.39531e-06	4.6712e-05	4.33057
LIHC	15q	0.280894	0.15577	0.0723145	0.207214	0.683581			LIHC	15q	0.504729	0.104045	1.87317e-06	3.98049e-05	4.40006
LIHC	16p	-0.363123	0.213742	0.0902112	0.238545	0.62243			LIHC	16p	1.01538	0.319325	0.00160507	0.011265	1.94827
LIHC	16q	1.69578	0.709962	0.0174958	0.075751	1.12061			LIHC	16q	0.196725	0.117375	0.0945961	0.221472	0.654681
LIHC	17p	0.320008	0.243787	0.190632	0.383826	0.415866			LIHC	17p	0.242277	0.0739758	0.00116002	0.0082936	2.08126
LIHC	17q	0.264896	0.0885876	0.00298065	0.0212019	1.67362			LIHC	17q	0.56512	0.357046	0.114525	0.251757	0.599019
LIHC	18p	0.167379	0.175331	0.340412	0.553624	0.256785			LIHC	18p	0.287487	0.228578	0.20933	0.363948	0.438961
LIHC	18q	-0.316974	0.510794	0.535303	0.714277	0.146133			LIHC	18q	0.267169	0.181917	0.142806	0.284496	0.545924
LIHC	19p	0.276251	0.240002	0.250515	0.458029	0.339107			LIHC	19p	0.449413	0.161531	0.00568681	0.0297973	1.52582
LIHC	19q	0.114475	0.149827	0.445339	0.65228	0.185566			LIHC	19q	0.656785	0.507372	0.196374	0.350177	0.455712
LIHC	1p	0.341218	0.232738	0.143615	0.328979	0.482832			LIHC	1p	0.126517	0.113579	0.266079	0.423856	0.372782
LIHC	1q	-0.084208	0.0492608	0.0882276	0.234876	0.629161			LIHC	1q	NA	NA	NA	NA	NA
LIHC	20p	0.617503	0.255663	0.0162342	0.0718682	1.14346			LIHC	20p	-0.0068518	0.208485	0.973801	0.980207	0.00868201
LIHC	20q	0.131803	0.200736	0.511858	0.703917	0.152479			LIHC	20q	NA	NA	NA	NA	NA
LIHC	21q	-0.0198239	0.172127	0.908392	0.955691	0.0196823			LIHC	21q	0.140033	0.0894984	0.118585	0.256134	0.591532
LIHC	22q	0.159876	0.118167	0.177047	0.365641	0.436945			LIHC	22q	0.350025	0.104253	0.00088028	0.0066021	2.18032
LIHC	2p	0.526576	0.272913	0.0544607	0.17166	0.76533			LIHC	2p	0.413505	0.410157	0.314063	0.48148	0.317422
LIHC	2q	-0.028054	0.417133	0.946417	0.973599	0.01162			LIHC	2q	0.324319	0.29176	0.267057	0.423856	0.372782
LIHC	3p	0.615291	0.252575	0.0153416	0.0698794	1.15565			LIHC	3p	0.490701	0.234229	0.0368787	0.119543	0.922474
LIHC	3q	0.111278	0.272625	0.68339	0.828479	0.0817187			LIHC	3q	0.564536	0.713106	0.429089	0.600097	0.221778
LIHC	4p	0.0161474	0.167969	0.92347	0.96339	0.016198			LIHC	4p	0.349012	0.193296	0.0718527	0.184454	0.734112
LIHC	4q	-0.205595	0.835997	0.805899	0.896961	0.0472266			LIHC	4q	0.23539	0.111806	0.0359517	0.117034	0.931687
LIHC	5p	0.377574	0.0997374	0.000179454	0.00248087	2.6054			LIHC	5p	2.15317	0.688267	0.00191427	0.0128458	1.89124
LIHC	5q	0.238046	0.191998	0.215865	0.420003	0.376747			LIHC	5q	0.631238	0.215937	0.00368877	0.0218752	1.66005
LIHC	6p	-0.133197	0.0700311	0.0579678	0.178432	0.748527			LIHC	6p	NA	NA	NA	NA	NA
LIHC	6q	-0.345267	0.143299	0.0165744	0.0728903	1.13733			LIHC	6q	-0.128609	0.102076	0.208539	0.363948	0.438961
LIHC	7p	0.24725	0.163956	0.132427	0.313221	0.504149			LIHC	7p	0.336067	0.417454	0.421347	0.591433	0.228095
LIHC	7q	0.133367	0.153012	0.384017	0.594698	0.225703			LIHC	7q	0.423005	0.202851	0.0377836	0.121447	0.915612
LIHC	8p	-0.0673934	0.100512	0.503246	0.696257	0.15723			LIHC	8p	0.078654	0.0688241	0.253934	0.413668	0.383348
LIHC	8q	0.0945101	0.0494818	0.0569392	0.176646	0.752896			LIHC	8q	0.462217	0.286812	0.108558	0.242827	0.614703
LIHC	9p	0.0773275	0.371145	0.835083	0.913422	0.0393285			LIHC	9p	0.352198	0.146516	0.0167326	0.0656435	1.18281
LIHC	9q	0.214448	0.363512	0.555616	0.726131	0.138985			LIHC	9q	0.206564	0.200534	0.303672	0.471216	0.32678
LUAD	10p	0.344561	0.140655	0.0146394	0.0678578	1.1684			LUAD	10p	0.729092	0.279105	0.00927906	0.0427619	1.36894
LUAD	10q	0.0797147	0.330042	0.809247	0.899417	0.0460391			LUAD	10q	0.288044	0.186279	0.122658	0.261374	0.582737
LUAD	11p	0.383148	0.39145	0.328168	0.544746	0.263806			LUAD	11p	0.585289	0.186285	0.00177687	0.0120293	1.91976
LUAD	11q	0.232222	0.20018	0.246578	0.457041	0.340045			LUAD	11q	0.544912	0.252366	0.0313173	0.107508	0.968559
LUAD	12p	0.479234	0.151592	0.0016681	0.0147692	1.83064			LUAD	12p	0.0324365	0.17519	0.853188	0.903414	0.0441131
LUAD	12q	0.840461	0.275952	0.00244263	0.018654	1.72923			LUAD	12q	0.133078	0.39005	0.73311	0.830858	0.0804733
LUAD	13q	0.174504	0.19516	0.371816	0.5874	0.231066			LUAD	13q	0.354468	0.0842659	3.08505e-05	0.000374613	3.42642
LUAD	14q	0.270134	0.0940263	0.00425957	0.0275126	1.56047			LUAD	14q	0.20062	0.117942	0.0896441	0.217018	0.663504
LUAD	15q	-0.157416	0.212041	0.458312	0.661447	0.179505			LUAD	15q	0.320837	0.0884051	0.000314083	0.00279387	2.55379
LUAD	16p	-0.220873	0.128678	0.0866901	0.233146	0.632372			LUAD	16p	0.309051	0.330016	0.349514	0.516267	0.287126
LUAD	16q	0.0457178	0.332703	0.89076	0.941677	0.0260978			LUAD	16q	0.0841558	0.208824	0.687121	0.791638	0.101474
LUAD	17p	0.305292	0.365956	0.40465	0.61361	0.212107			LUAD	17p	0.250257	0.0926345	0.00713358	0.0356679	1.44772
LUAD	17q	0.443185	0.116305	0.000155618	0.00222405	2.65286			LUAD	17q	0.996317	0.649154	0.12553	0.262819	0.580343
LUAD	18p	0.345337	0.133566	0.010004	0.0518631	1.28514			LUAD	18p	0.354941	0.296428	0.231748	0.386246	0.413136
LUAD	18q	0.77154	0.206845	0.000215153	0.0029019	2.53732			LUAD	18q	0.107393	0.12862	0.404137	0.574656	0.240592
LUAD	19p	0.362971	0.326783	0.267278	0.476504	0.321934			LUAD	19p	0.161702	0.116632	0.166227	0.317909	0.497697
LUAD	19q	0.532027	0.149551	0.000409467	0.00460943	2.33635			LUAD	19q	0.114018	0.49814	0.819053	0.888213	0.051483
LUAD	1p	-0.0246145	0.267462	0.926712	0.96339	0.016198			LUAD	1p	0.0375797	0.17064	0.825783	0.893528	0.0488919
LUAD	1q	-0.197377	0.0729275	0.00702735	0.0401272	1.39656			LUAD	1q	NA	NA	NA	NA	NA
LUAD	20p	0.368545	0.207284	0.0760539	0.213276	0.671058			LUAD	20p	0.0472608	0.143661	0.742316	0.833716	0.0789817
LUAD	20q	0.338566	0.161598	0.0366611	0.133577	0.87427			LUAD	20q	-0.404177	0.294579	0.170684	0.320033	0.494805
LUAD	21q	-0.00249764	0.12923	0.984589	0.992144	0.0034255			LUAD	21q	0.390368	0.10288	0.000167735	0.0016451	2.78381
LUAD	22q	0.54806	0.199413	0.00626688	0.0371301	1.43027			LUAD	22q	0.369119	0.0894487	4.32484e-05	0.000486544	3.31288
LUAD	2p	0.466389	0.186641	0.0127759	0.0615268	1.21094			LUAD	2p	-0.467431	0.360253	0.195066	0.350177	0.455712
LUAD	2q	0.132494	0.293206	0.651548	0.807263	0.0929848			LUAD	2q	1.21079	0.616528	0.0500953	0.144071	0.841423
LUAD	3p	0.852878	0.383182	0.0265109	0.102909	0.987545			LUAD	3p	0.613203	0.127992	2.18437e-06	4.48214e-05	4.34851
LUAD	3q	0.628233	0.134064	3.58461e-06	0.000112987	3.94697			LUAD	3q	-0.110887	0.388515	0.775451	0.854783	0.0681439
LUAD	4p	0.125148	0.166806	0.453451	0.658046	0.181743			LUAD	4p	-0.304115	0.262171	0.246626	0.406613	0.390819
LUAD	4q	-0.17471	0.619483	0.778042	0.878362	0.0563264			LUAD	4q	0.0966927	0.227686	0.671252	0.781595	0.107018
LUAD	5p	0.275146	0.0630839	1.56249e-05	0.000373735	3.42744			LUAD	5p	NA	NA	NA	NA	NA
LUAD	5q	-0.0518848	0.178897	0.77193	0.875224	0.0578806			LUAD	5q	0.260508	0.115897	0.0250311	0.0910845	1.04056
LUAD	6p	-0.032976	0.106951	0.75796	0.864359	0.0633056			LUAD	6p	-0.400748	0.869462	0.645084	0.771077	0.112902
LUAD	6q	0.386413	0.513423	0.452096	0.657291	0.182242			LUAD	6q	-0.15393	0.101969	0.131772	0.267577	0.57255
LUAD	7p	0.204644	0.0816143	0.0124744	0.060678	1.21697			LUAD	7p	0.196096	0.312409	0.53054	0.68674	0.163208
LUAD	7q	0.0954818	0.141866	0.501232	0.696257	0.15723			LUAD	7q	-0.063619	0.268823	0.813022	0.884726	0.0531914
LUAD	8p	0.384673	0.185157	0.0383853	0.138385	0.858911			LUAD	8p	0.395071	0.089193	1.16598e-05	0.000162178	3.79001
LUAD	8q	0.292588	0.0717191	5.23641e-05	0.000877934	3.05654			LUAD	8q	0.259267	0.505382	0.608217	0.745207	0.127723
LUAD	9p	0.24817	0.229948	0.281035	0.493219	0.30696			LUAD	9p	-0.02257	0.135783	0.868051	0.908992	0.0414398
LUAD	9q	0.524838	0.335652	0.11855	0.291021	0.536076			LUAD	9q	0.295369	0.188959	0.118647	0.256134	0.591532
LUSC	10p	0.105177	0.12489	0.400126	0.613423	0.21224			LUSC	10p	0.059246	0.116496	0.611289	0.745915	0.127311
LUSC	10q	-0.0761138	0.264269	0.773461	0.875701	0.0576443			LUSC	10q	0.0119271	0.104021	0.90876	0.936929	0.0282931
LUSC	11p	0.319224	0.116029	0.00617247	0.0368478	1.43359			LUSC	11p	0.165235	0.0907849	0.0693636	0.180487	0.743555
LUSC	11q	0.298619	0.109577	0.00666139	0.0385969	1.41345			LUSC	11q	0.297136	0.121864	0.0151203	0.0612011	1.21324
LUSC	12p	0.164336	0.0522805	0.00177011	0.015328	1.81451			LUSC	12p	0.118373	0.244186	0.628101	0.761486	0.118338
LUSC	12q	-0.241002	0.170585	0.158341	0.341191	0.467003			LUSC	12q	-0.0357396	0.262502	0.891758	0.924383	0.0341479
LUSC	13q	0.15868	0.130895	0.226425	0.436383	0.360132			LUSC	13q	0.226106	0.0527704	2.21252e-05	0.000286877	3.5423
LUSC	14q	0.105194	0.0725591	0.147923	0.331146	0.47998			LUSC	14q	0.270523	0.0642261	3.07649e-05	0.000374613	3.42642
LUSC	15q	0.26464	0.0839557	0.00173479	0.015189	1.81847			LUSC	15q	0.152172	0.0747023	0.0422343	0.12935	0.888233
LUSC	16p	0.201436	0.196636	0.30616	0.525607	0.279339			LUSC	16p	0.262362	0.116891	0.0252417	0.0910845	1.04056
LUSC	16q	0.413905	0.163685	0.0117773	0.0583679	1.23383			LUSC	16q	0.0666579	0.101917	0.513389	0.669068	0.17453
LUSC	17p	0.043139	0.198407	0.828002	0.912906	0.0395739			LUSC	17p	0.112519	0.0564281	0.0466995	0.137404	0.862
LUSC	17q	0.347407	0.0739414	3.39184e-06	0.000111366	3.95325			LUSC	17q	-0.0226643	0.416401	0.956618	0.968006	0.0141218
LUSC	18p	0.0730489	0.0735062	0.320826	0.541351	0.266521			LUSC	18p	0.237093	0.14038	0.0919124	0.219291	0.65898
LUSC	18q	0.448076	0.176709	0.0115645	0.0577817	1.23821			LUSC	18q	0.219003	0.076258	0.00425658	0.0246688	1.60785
LUSC	19p	0.194825	0.139376	0.16284	0.34494	0.462256			LUSC	19p	0.0871072	0.0893299	0.329985	0.497906	0.302853
LUSC	19q	0.0928208	0.0806065	0.250074	0.458029	0.339107			LUSC	19q	-0.0347558	0.17233	0.840255	0.903096	0.0442659
LUSC	1p	0.43057	0.228789	0.0605103	0.183039	0.737456			LUSC	1p	0.155747	0.075886	0.0406569	0.126334	0.898479
LUSC	1q	0.18983	0.0587401	0.00131125	0.0121579	1.91514			LUSC	1q	NA	NA	NA	NA	NA
LUSC	20p	0.170723	0.0677637	0.0120718	0.0594537	1.22582			LUSC	20p	0.254651	0.157929	0.107566	0.241313	0.617419
LUSC	20q	0.243422	0.0759522	0.00143925	0.0130359	1.88486			LUSC	20q	0.241157	0.157922	0.127431	0.262917	0.580182
LUSC	21q	0.181213	0.112052	0.106819	0.268069	0.571753			LUSC	21q	0.298804	0.0537777	4.60783e-08	1.60227e-06	5.79527
LUSC	22q	0.158787	0.0534444	0.00313065	0.0216399	1.66474			LUSC	22q	0.178733	0.0827036	0.0313389	0.107508	0.968559
LUSC	2p	0.175828	0.0657213	0.00770861	0.0427774	1.36879			LUSC	2p	0.300516	0.59655	0.614691	0.748668	0.125711
LUSC	2q	0.15292	0.196826	0.437574	0.644502	0.190776			LUSC	2q	0.219877	0.163027	0.178047	0.330316	0.48107
LUSC	3p	0.145409	0.0726949	0.0463189	0.15651	0.805458			LUSC	3p	0.196742	0.0558254	0.000467116	0.00388417	2.4107
LUSC	3q	0.127376	0.0353645	0.0003476	0.00402807	2.3949			LUSC	3q	0.189066	0.371653	0.611358	0.745915	0.127311
LUSC	4p	0.00387915	0.1604	0.980716	0.991856	0.00355128			LUSC	4p	0.187564	0.0882938	0.0341446	0.113568	0.944745
LUSC	4q	0.000291847	0.223661	0.998959	0.998959	0.000452158			LUSC	4q	0.203746	0.133709	0.128193	0.262917	0.580182
LUSC	5p	0.113201	0.0357695	0.00164626	0.0147415	1.83146			LUSC	5p	NA	NA	NA	NA	NA
LUSC	5q	0.0667063	0.076556	0.384201	0.594698	0.225703			LUSC	5q	0.117709	0.0557841	0.0353838	0.116174	0.93489
LUSC	6p	0.141581	0.121621	0.244953	0.457041	0.340045			LUSC	6p	0.205552	0.131563	0.11886	0.256134	0.591532
LUSC	6q	0.225411	0.159864	0.159191	0.341191	0.467003			LUSC	6q	0.115689	0.112794	0.305559	0.472227	0.325849
LUSC	7p	0.136259	0.0821627	0.0978826	0.252064	0.59849			LUSC	7p	0.209263	0.137243	0.127999	0.262917	0.580182
LUSC	7q	0.0514818	0.103341	0.618582	0.778663	0.108651			LUSC	7q	0.244729	0.186846	0.190897	0.344871	0.462343
LUSC	8p	0.237182	0.102853	0.0216803	0.0880622	1.05521			LUSC	8p	0.191199	0.0571878	0.00089341	0.00663552	2.17813
LUSC	8q	0.139522	0.0504281	0.00587139	0.0355896	1.44868			LUSC	8q	0.658122	0.345898	0.0578305	0.158797	0.799159
LUSC	9p	0.140567	0.091616	0.12571	0.302934	0.518652			LUSC	9p	0.089359	0.0661029	0.177063	0.330316	0.48107
LUSC	9q	0.328007	0.0996255	0.0010654	0.0103736	1.98407			LUSC	9q	0.00226649	0.154065	0.988269	0.990859	0.00398805
PAAD	10p	-0.0953512	0.449238	0.832178	0.91331	0.039382			PAAD	10p	0.160582	0.164256	0.329654	0.497906	0.302853
PAAD	10q	NA	NA	NA	NA	NA			PAAD	10q	-0.311597	0.315257	0.324366	0.49332	0.306872
PAAD	11p	0.0894698	0.260785	0.73197	0.856162	0.0674443			PAAD	11p	0.391229	0.266068	0.143332	0.284523	0.545882
PAAD	11q	0.392158	0.226218	0.084834	0.231312	0.635802			PAAD	11q	-0.17815	0.313039	0.570059	0.720819	0.142174
PAAD	12p	0.171898	0.125959	0.174178	0.363051	0.440032			PAAD	12p	0.0442184	0.251879	0.860862	0.904668	0.0435106
PAAD	12q	1.46493	0.437529	0.00101287	0.0101031	1.99555			PAAD	12q	0.279317	0.147534	0.0600357	0.161739	0.791186
PAAD	13q	0.272056	0.0883946	0.00246196	0.018654	1.72923			PAAD	13q	0.371217	0.119877	0.00232862	0.0149697	1.82479
PAAD	14q	0.406115	0.108617	0.000256428	0.00320738	2.49385			PAAD	14q	0.322662	0.149011	0.0318511	0.108303	0.965361
PAAD	15q	0.110055	0.175998	0.532675	0.712645	0.147127			PAAD	15q	0.0413102	0.126918	0.745229	0.833716	0.0789817
PAAD	16p	-0.0884922	0.256571	0.730598	0.856162	0.0674443			PAAD	16p	0.735854	0.313556	0.0201082	0.0761524	1.11832
PAAD	16q	-0.176447	0.451871	0.696682	0.831796	0.0799831			PAAD	16q	-0.0967976	0.226967	0.670298	0.781595	0.107018
PAAD	17p	0.524146	0.183658	0.00509502	0.032378	1.48975			PAAD	17p	0.316179	0.0691495	9.3161e-06	0.000131978	3.8795
PAAD	17q	0.269671	0.201289	0.182137	0.371434	0.430119			PAAD	17q	0.265395	0.441683	0.548749	0.707914	0.150019
PAAD	18p	0.0278215	0.147578	0.850699	0.917033	0.0376151			PAAD	18p	0.0730919	0.229377	0.750405	0.834996	0.0783155
PAAD	18q	NA	NA	NA	NA	NA			PAAD	18q	0.191201	0.0764044	0.0132767	0.0560404	1.2515
PAAD	19p	0.526089	0.221738	0.0188233	0.0797343	1.09835			PAAD	19p	0.321741	0.182447	0.0796282	0.198422	0.70241
PAAD	19q	0.261069	0.131041	0.047952	0.157442	0.802879			PAAD	19q	-0.299547	0.430683	0.48776	0.641128	0.193055
PAAD	1p	0.163619	0.260179	0.530377	0.711598	0.147765			PAAD	1p	0.295528	0.112135	0.00919353	0.0426245	1.37034
PAAD	1q	0.00910097	0.0960321	0.92461	0.96339	0.016198			PAAD	1q	0.241275	0.464747	0.604419	0.745038	0.127821
PAAD	20p	-0.544841	0.448761	0.226498	0.436383	0.360132			PAAD	20p	0.0840873	0.147386	0.569081	0.720819	0.142174
PAAD	20q	0.178872	0.156184	0.253709	0.458538	0.338624			PAAD	20q	NA	NA	NA	NA	NA
PAAD	21q	NA	NA	NA	NA	NA			PAAD	21q	0.254885	0.0913174	0.00585217	0.0302494	1.51928
PAAD	22q	0.370821	0.239056	0.123051	0.299273	0.523932			PAAD	22q	0.18886	0.0949521	0.0483438	0.141157	0.850299
PAAD	2p	NA	NA	NA	NA	NA			PAAD	2p	0.0974052	0.261695	0.710201	0.812113	0.0903833
PAAD	2q	-0.583671	0.445009	0.191426	0.383826	0.415866			PAAD	2q	NA	NA	NA	NA	NA
PAAD	3p	NA	NA	NA	NA	NA			PAAD	3p	0.156334	0.129313	0.228357	0.383541	0.416188
PAAD	3q	0.226132	0.234628	0.336529	0.55132	0.258596			PAAD	3q	0.640773	0.446106	0.152779	0.29695	0.527316
PAAD	4p	0.405174	0.225929	0.0747341	0.210448	0.676856			PAAD	4p	0.253259	0.222944	0.257604	0.414007	0.382992
PAAD	4q	NA	NA	NA	NA	NA			PAAD	4q	0.387914	0.321637	0.22947	0.384124	0.415529
PAAD	5p	0.310689	0.142694	0.0308446	0.115741	0.936513			PAAD	5p	0.238338	0.444915	0.592901	0.737511	0.132232
PAAD	5q	NA	NA	NA	NA	NA			PAAD	5q	0.107063	0.331502	0.747119	0.833716	0.0789817
PAAD	6p	NA	NA	NA	NA	NA			PAAD	6p	-0.0464933	0.449968	0.917826	0.942466	0.0257344
PAAD	6q	NA	NA	NA	NA	NA			PAAD	6q	-0.0651088	0.125392	0.604268	0.745038	0.127821
PAAD	7p	0.103568	0.262059	0.693184	0.83151	0.0801323			PAAD	7p	NA	NA	NA	NA	NA
PAAD	7q	-0.0521555	0.316688	0.869387	0.931334	0.0308945			PAAD	7q	0.351204	0.261845	0.181644	0.335072	0.474862
PAAD	8p	0.290789	0.433752	0.503638	0.696257	0.15723			PAAD	8p	0.256693	0.0954089	0.00785207	0.0377788	1.42275
PAAD	8q	0.34928	0.127018	0.00661132	0.0385905	1.41352			PAAD	8q	0.18566	0.434911	0.670043	0.781595	0.107018
PAAD	9p	NA	NA	NA	NA	NA			PAAD	9p	0.0744513	0.0953489	0.435988	0.604439	0.218647
PAAD	9q	0.0493093	0.448731	0.91263	0.958642	0.0183434			PAAD	9q	0.0829562	0.448625	0.85352	0.903414	0.0441131
PCPG	10p	-0.283527	0.211726	0.182417	0.371434	0.430119			PCPG	10p	NA	NA	NA	NA	NA
PCPG	10q	-0.815959	0.357523	0.0237835	0.0946534	1.02386			PCPG	10q	NA	NA	NA	NA	NA
PCPG	11p	0.238587	0.164215	0.14849	0.331473	0.479551			PCPG	11p	-0.0816277	0.085237	0.33969	0.507279	0.294753
PCPG	11q	-0.13876	0.366134	0.705219	0.838179	0.0766632			PCPG	11q	-0.0035988	0.14018	0.97955	0.984022	0.00699506
PCPG	12p	NA	NA	NA	NA	NA			PCPG	12p	0.445501	0.25526	0.0828432	0.204436	0.689443
PCPG	12q	0.546121	0.361431	0.132761	0.313221	0.504149			PCPG	12q	0.283444	0.362389	0.43528	0.604439	0.218647
PCPG	13q	-0.0646741	0.139152	0.642747	0.8014	0.0961507			PCPG	13q	0.0704895	0.149949	0.638955	0.768554	0.114325
PCPG	14q	0.173728	0.18994	0.361896	0.578446	0.237737			PCPG	14q	-0.109957	0.0964676	0.256092	0.414007	0.382992
PCPG	15q	0.0770464	0.101875	0.450607	0.657291	0.182242			PCPG	15q	0.0192964	0.213071	0.927961	0.948059	0.0231646
PCPG	16p	-0.256268	0.172781	0.14004	0.325522	0.48742			PCPG	16p	0.64628	0.156043	5.56722e-05	0.000617236	3.20955
PCPG	16q	0.317329	0.359064	0.378148	0.590061	0.229103			PCPG	16q	0.740848	0.359224	0.0407903	0.126334	0.898479
PCPG	17p	NA	NA	NA	NA	NA			PCPG	17p	0.096684	0.0625367	0.12406	0.262637	0.580645
PCPG	17q	0.227473	0.138897	0.10346	0.263841	0.578658			PCPG	17q	-0.311502	0.2544	0.222613	0.377603	0.422965
PCPG	18p	0.432419	0.363636	0.236234	0.44856	0.34818			PCPG	18p	-0.0365533	0.125134	0.770579	0.850639	0.0702547
PCPG	18q	0.0621493	0.261039	0.812121	0.90092	0.0453139			PCPG	18q	0.0390728	0.372871	0.916675	0.942466	0.0257344
PCPG	19p	-0.0550814	0.164577	0.738299	0.861079	0.0649572			PCPG	19p	NA	NA	NA	NA	NA
PCPG	19q	NA	NA	NA	NA	NA			PCPG	19q	0.00999064	0.166866	0.952332	0.965424	0.015282
PCPG	1p	NA	NA	NA	NA	NA			PCPG	1p	0.171214	0.0550731	0.00222135	0.0144011	1.8416
PCPG	1q	0.108075	0.118197	0.361891	0.578446	0.237737			PCPG	1q	NA	NA	NA	NA	NA
PCPG	20p	-0.0663613	0.210728	0.753239	0.863978	0.0634975			PCPG	20p	0.385123	0.259296	0.139466	0.280031	0.552795
PCPG	20q	NA	NA	NA	NA	NA			PCPG	20q	0.226864	0.256682	0.378104	0.547821	0.261361
PCPG	21q	-0.138756	0.257042	0.590232	0.758817	0.119863			PCPG	21q	-0.077117	0.0741916	0.300183	0.467698	0.330034
PCPG	22q	0.538086	0.253478	0.0359722	0.131842	0.879945			PCPG	22q	0.222734	0.0584243	0.000196495	0.00190277	2.72061
PCPG	2p	0.333279	0.185085	0.0736728	0.209582	0.678647			PCPG	2p	-0.208011	0.179189	0.247466	0.406658	0.390771
PCPG	2q	NA	NA	NA	NA	NA			PCPG	2q	-0.0617006	0.140447	0.661022	0.776777	0.109704
PCPG	3p	0.358338	0.365987	0.329077	0.544746	0.263806			PCPG	3p	0.207984	0.130008	0.111622	0.247509	0.606409
PCPG	3q	NA	NA	NA	NA	NA			PCPG	3q	0.111234	0.0686313	0.107029	0.240815	0.618316
PCPG	4p	0.0294601	0.271185	0.91363	0.958642	0.0183434			PCPG	4p	-0.370911	0.207352	0.0755516	0.190749	0.719538
PCPG	4q	0.331503	0.364419	0.364371	0.58005	0.236535			PCPG	4q	-0.334945	0.257873	0.195855	0.350177	0.455712
PCPG	5p	0.0682676	0.166861	0.682995	0.828479	0.0817187			PCPG	5p	0.114325	0.255178	0.65476	0.775726	0.110292
PCPG	5q	-0.184247	0.364256	0.61369	0.77498	0.11071			PCPG	5q	0.125232	0.21141	0.554441	0.709333	0.14915
PCPG	6p	0.0829774	0.150735	0.582748	0.751564	0.124034			PCPG	6p	NA	NA	NA	NA	NA
PCPG	6q	NA	NA	NA	NA	NA			PCPG	6q	0.241589	0.0940359	0.0111035	0.0488172	1.31143
PCPG	7p	-0.0773204	0.150997	0.609306	0.773015	0.111812			PCPG	7p	NA	NA	NA	NA	NA
PCPG	7q	0.132464	0.183688	0.471904	0.674883	0.170772			PCPG	7q	0.0988109	0.166825	0.554485	0.709333	0.14915
PCPG	8p	0.0354713	0.371277	0.924014	0.96339	0.016198			PCPG	8p	0.238755	0.114471	0.0385903	0.122496	0.911877
PCPG	8q	-0.0551626	0.273398	0.840364	0.913422	0.0393285			PCPG	8q	0.0925782	0.154435	0.549717	0.707969	0.149986
PCPG	9p	0.0737728	0.355546	0.835895	0.913422	0.0393285			PCPG	9p	0.501941	0.179274	0.00574241	0.029884	1.52456
PCPG	9q	NA	NA	NA	NA	NA			PCPG	9q	0.0840615	0.211126	0.691041	0.794957	0.0996562
PRAD	10p	0.18608	0.240964	0.440354	0.647386	0.188836			PRAD	10p	0.148379	0.170817	0.385472	0.554033	0.256465
PRAD	10q	0.511787	0.155614	0.00107949	0.0103736	1.98407			PRAD	10q	0.236282	0.167768	0.159658	0.30688	0.513031
PRAD	11p	0.372015	0.396492	0.348575	0.563642	0.248996			PRAD	11p	1.02227	0.203892	7.48228e-07	1.84643e-05	4.73367
PRAD	11q	0.395696	0.245804	0.108086	0.270386	0.568016			PRAD	11q	NA	NA	NA	NA	NA
PRAD	12p	0.32562	0.169959	0.055997	0.175102	0.756709			PRAD	12p	0.145967	0.0788788	0.0648455	0.17165	0.765356
PRAD	12q	0.380831	0.157049	0.0156744	0.0705795	1.15132			PRAD	12q	0.502979	0.289877	0.0833544	0.205036	0.68817
PRAD	13q	0.937824	0.255755	0.000276061	0.003399	2.46865			PRAD	13q	0.379292	0.0557835	3.08592e-11	2.62303e-09	8.5812
PRAD	14q	0.531034	0.182328	0.00375303	0.024852	1.60464			PRAD	14q	0.44434	0.123803	0.000365645	0.00321515	2.4928
PRAD	15q	0.2683	0.278666	0.336141	0.55132	0.258596			PRAD	15q	0.559058	0.0975255	1.7381e-08	6.99815e-07	6.15502
PRAD	16p	-0.104023	0.17138	0.544152	0.719145	0.143183			PRAD	16p	NA	NA	NA	NA	NA
PRAD	16q	-0.37974	0.393607	0.335223	0.55132	0.258596			PRAD	16q	0.262429	0.0511057	4.08331e-07	1.16468e-05	4.9338
PRAD	17p	NA	NA	NA	NA	NA			PRAD	17p	0.339471	0.0607854	3.88823e-08	1.48725e-06	5.82762
PRAD	17q	0.550212	0.293913	0.0618013	0.185169	0.732432			PRAD	17q	-0.398519	0.415223	0.337647	0.50548	0.296296
PRAD	18p	0.410649	0.147693	0.00564096	0.034458	1.46271			PRAD	18p	0.367139	0.16784	0.0291883	0.101496	0.993553
PRAD	18q	NA	NA	NA	NA	NA			PRAD	18q	0.288943	0.0693511	3.65948e-05	0.000424167	3.37246
PRAD	19p	0.336466	0.293542	0.252265	0.458029	0.339107			PRAD	19p	0.626199	0.292928	0.0330366	0.110962	0.954827
PRAD	19q	1.73678	0.408751	2.57197e-05	0.000533345	3.27299			PRAD	19q	NA	NA	NA	NA	NA
PRAD	1p	1.7449	0.407262	2.21406e-05	0.000471535	3.32649			PRAD	1p	0.310442	0.137385	0.0242835	0.090179	1.04489
PRAD	1q	0.361345	0.131841	0.00635385	0.0373644	1.42754			PRAD	1q	NA	NA	NA	NA	NA
PRAD	20p	NA	NA	NA	NA	NA			PRAD	20p	0.180398	0.11658	0.122409	0.261374	0.582737
PRAD	20q	0.524359	0.156756	0.000885849	0.00894935	2.04821			PRAD	20q	NA	NA	NA	NA	NA
PRAD	21q	0.325299	0.107741	0.00267049	0.0195501	1.70885			PRAD	21q	0.431194	0.107403	6.90885e-05	0.000724009	3.14026
PRAD	22q	0.231232	0.379916	0.54306	0.719145	0.143183			PRAD	22q	0.533733	0.0856499	9.99082e-10	5.09532e-08	7.29283
PRAD	2p	0.344188	0.240535	0.153089	0.335719	0.474024			PRAD	2p	NA	NA	NA	NA	NA
PRAD	2q	NA	NA	NA	NA	NA			PRAD	2q	0.59146	0.239575	0.013898	0.0577824	1.2382
PRAD	3p	0.496687	0.289704	0.0870825	0.233405	0.63189			PRAD	3p	0.623696	0.204196	0.00237869	0.0151642	1.81918
PRAD	3q	0.226248	0.116519	0.0527445	0.169643	0.770463			PRAD	3q	0.207011	0.41199	0.615571	0.748668	0.125711
PRAD	4p	0.161028	0.181298	0.374879	0.589631	0.22942			PRAD	4p	0.640745	0.136968	3.75712e-06	6.24826e-05	4.20424
PRAD	4q	-0.178233	0.416356	0.668785	0.8196	0.0863983			PRAD	4q	0.483324	0.240199	0.0447503	0.133726	0.873783
PRAD	5p	0.825986	0.121218	2.81746e-11	3.08778e-09	8.51035			PRAD	5p	-0.00401698	0.161474	0.980163	0.984022	0.00699506
PRAD	5q	0.458746	0.394639	0.245634	0.457041	0.340045			PRAD	5q	0.596246	0.113479	2.22487e-07	6.80809e-06	5.16697
PRAD	6p	0.157875	0.189822	0.405984	0.61361	0.212107			PRAD	6p	NA	NA	NA	NA	NA
PRAD	6q	NA	NA	NA	NA	NA			PRAD	6q	0.0570967	0.097852	0.559826	0.711406	0.147882
PRAD	7p	0.452072	0.130948	0.000604039	0.0064322	2.19164			PRAD	7p	NA	NA	NA	NA	NA
PRAD	7q	0.566998	0.146217	0.000119846	0.00174887	2.75724			PRAD	7q	0.335911	0.409915	0.412925	0.582819	0.234467
PRAD	8p	0.302934	0.0830841	0.000305032	0.0036419	2.43867			PRAD	8p	0.153302	0.0417115	0.000264706	0.00238236	2.62299
PRAD	8q	0.204882	0.0368971	4.62437e-08	2.2775e-06	5.64254			PRAD	8q	0.588282	0.398556	0.140695	0.281758	0.550124
PRAD	9p	0.729266	0.290691	0.0124465	0.060678	1.21697			PRAD	9p	0.356202	0.125431	0.0047028	0.0256975	1.59011
PRAD	9q	0.369584	0.120461	0.00227395	0.0175674	1.75529			PRAD	9q	NA	NA	NA	NA	NA
READ	10p	-0.336945	0.1983	0.091346	0.239049	0.621514			READ	10p	0.0477914	0.306003	0.876102	0.913346	0.0393648
READ	10q	0.276652	0.52504	0.599046	0.765071	0.116298			READ	10q	-0.238338	0.201405	0.238494	0.395766	0.402562
READ	11p	0.479689	0.185524	0.0106672	0.0545826	1.26295			READ	11p	0.328857	0.301297	0.276863	0.435831	0.360681
READ	11q	NA	NA	NA	NA	NA			READ	11q	0.148894	0.199461	0.456514	0.621411	0.206621
READ	12p	0.292672	0.215893	0.177253	0.365641	0.436945			READ	12p	0.107345	0.197196	0.587013	0.733736	0.13446
READ	12q	NA	NA	NA	NA	NA			READ	12q	-0.094402	0.524339	0.857358	0.903414	0.0441131
READ	13q	-0.0606364	0.0557728	0.27869	0.491293	0.30866			READ	13q	0.217167	0.270342	0.425456	0.596106	0.224677
READ	14q	0.212688	0.264648	0.423479	0.62907	0.201301			READ	14q	0.0923829	0.0879151	0.295042	0.46157	0.335763
READ	15q	0.0771405	0.405227	0.849444	0.916934	0.0376621			READ	15q	-0.141415	0.0846688	0.0969351	0.225396	0.647054
READ	16p	-0.274016	0.186687	0.144202	0.329366	0.482321			READ	16p	NA	NA	NA	NA	NA
READ	16q	0.0791008	0.240142	0.742316	0.861079	0.0649572			READ	16q	-0.165634	0.305042	0.587948	0.733736	0.13446
READ	17p	0.221736	0.322111	0.492983	0.691228	0.160379			READ	17p	0.0411627	0.085237	0.629851	0.762399	0.117818
READ	17q	0.00392068	0.12847	0.975694	0.989506	0.00458137			READ	17q	0.334603	0.496705	0.501656	0.657135	0.182346
READ	18p	-0.0703463	0.215143	0.744155	0.861079	0.0649572			READ	18p	0.134209	0.18933	0.479504	0.63906	0.194458
READ	18q	-0.241274	0.267132	0.368005	0.584654	0.233101			READ	18q	0.0205722	0.106989	0.847775	0.903414	0.0441131
READ	19p	0.365187	0.198289	0.0674814	0.198415	0.702425			READ	19p	0.0656662	0.300489	0.827313	0.893918	0.0487022
READ	19q	0.0514991	0.147167	0.726871	0.854887	0.0680912			READ	19q	-0.760486	0.362479	0.0376145	0.121414	0.915731
READ	1p	0.0625129	0.234312	0.790015	0.886797	0.0521756			READ	1p	-0.0174648	0.156893	0.911512	0.938502	0.027565
READ	1q	0.153585	0.103398	0.139488	0.325196	0.487854			READ	1q	NA	NA	NA	NA	NA
READ	20p	-0.0490875	0.0716385	0.494335	0.691894	0.15996			READ	20p	0.110591	0.152554	0.469809	0.63384	0.19802
READ	20q	-0.023177	0.0492659	0.638701	0.797865	0.0980708			READ	20q	NA	NA	NA	NA	NA
READ	21q	0.0435505	0.215283	0.840071	0.913422	0.0393285			READ	21q	0.0135463	0.0868983	0.876334	0.913346	0.0393648
READ	22q	0.345581	0.227343	0.131283	0.313221	0.504149			READ	22q	0.0861899	0.0942886	0.362137	0.529704	0.275967
READ	2p	0.169143	0.302297	0.576637	0.747352	0.126475			READ	2p	0.114042	0.264398	0.666846	0.781595	0.107018
READ	2q	0.554153	0.258669	0.0337389	0.124818	0.903723			READ	2q	NA	NA	NA	NA	NA
READ	3p	0.916373	0.509325	0.0739985	0.209751	0.678296			READ	3p	0.358583	0.258726	0.167776	0.318194	0.497309
READ	3q	0.0877947	0.18673	0.638899	0.797865	0.0980708			READ	3q	NA	NA	NA	NA	NA
READ	4p	0.247903	0.29757	0.406099	0.61361	0.212107			READ	4p	0.752001	0.36776	0.0426095	0.12935	0.888233
READ	4q	-0.0485285	0.520822	0.925889	0.96339	0.016198			READ	4q	0.267748	0.216381	0.217838	0.373803	0.427357
READ	5p	-0.133386	0.133114	0.317916	0.539909	0.267679			READ	5p	0.413483	0.370714	0.266604	0.423856	0.372782
READ	5q	-0.265428	0.217489	0.224372	0.434411	0.362099			READ	5q	-0.16026	0.140956	0.257362	0.414007	0.382992
READ	6p	0.576305	0.169748	0.000874112	0.00894545	2.0484			READ	6p	-0.116389	0.509754	0.81971	0.888213	0.051483
READ	6q	0.457847	0.511292	0.37197	0.5874	0.231066			READ	6q	0.538221	0.260045	0.0401597	0.126334	0.898479
READ	7p	0.0652246	0.0827848	0.431977	0.638645	0.19474			READ	7p	NA	NA	NA	NA	NA
READ	7q	0.205221	0.1872	0.274673	0.486387	0.313018			READ	7q	NA	NA	NA	NA	NA
READ	8p	0.125222	0.175222	0.476426	0.677374	0.169171			READ	8p	0.104031	0.0776872	0.182647	0.335072	0.474862
READ	8q	0.0154039	0.0621832	0.804682	0.896873	0.0472689			READ	8q	NA	NA	NA	NA	NA
READ	9p	0.16721	0.144843	0.250139	0.458029	0.339107			READ	9p	0.839162	0.370314	0.0249065	0.0910845	1.04056
READ	9q	NA	NA	NA	NA	NA			READ	9q	-0.172833	0.369724	0.640829	0.769148	0.11399
SARC	10p	0.367273	0.163743	0.0258107	0.100687	0.997025			SARC	10p	0.194641	0.141502	0.170206	0.320033	0.494805
SARC	10q	NA	NA	NA	NA	NA			SARC	10q	0.242087	0.14298	0.0916391	0.219291	0.65898
SARC	11p	-0.125121	0.212021	0.555656	0.726131	0.138985			SARC	11p	0.26257	0.173028	0.130415	0.266047	0.575042
SARC	11q	0.312706	0.265819	0.24063	0.453237	0.343675			SARC	11q	0.37727	0.147748	0.0112532	0.0491927	1.3081
SARC	12p	0.206289	0.144443	0.154559	0.337374	0.471888			SARC	12p	0.259405	0.161882	0.110375	0.245459	0.61002
SARC	12q	-0.264502	0.313106	0.399065	0.612988	0.212548			SARC	12q	0.260889	0.206347	0.207268	0.363671	0.439292
SARC	13q	-0.0644546	0.194906	0.741359	0.861079	0.0649572			SARC	13q	0.113787	0.0779108	0.145439	0.286853	0.54234
SARC	14q	0.335182	0.106568	0.00191656	0.0158092	1.80109			SARC	14q	0.242092	0.102001	0.0185045	0.0714947	1.14573
SARC	15q	0.304031	0.0966386	0.00187936	0.0158092	1.80109			SARC	15q	0.191475	0.125155	0.127512	0.262917	0.580182
SARC	16p	0.0822774	0.128456	0.522431	0.708667	0.149558			SARC	16p	0.529602	0.253795	0.0379949	0.121615	0.915012
SARC	16q	-0.101301	0.327136	0.757131	0.864359	0.0633056			SARC	16q	-0.0407495	0.10477	0.697647	0.801351	0.0961773
SARC	17p	0.14493	0.134798	0.283394	0.495154	0.305259			SARC	17p	0.183978	0.142779	0.198812	0.352201	0.453209
SARC	17q	-0.215718	0.324157	0.506362	0.697742	0.156305			SARC	17q	0.651471	0.264379	0.014402	0.059234	1.22743
SARC	18p	0.0573658	0.132173	0.664661	0.817087	0.0877315			SARC	18p	0.399553	0.180927	0.0281851	0.0989063	1.00478
SARC	18q	0.0890152	0.198651	0.654495	0.808373	0.0923881			SARC	18q	0.25054	0.147596	0.090838	0.218755	0.660041
SARC	19p	0.153881	0.13177	0.243983	0.456671	0.340397			SARC	19p	0.606605	0.396778	0.127646	0.262917	0.580182
SARC	19q	-0.203301	0.212692	0.340092	0.553624	0.256785			SARC	19q	0.294067	0.203939	0.150577	0.294608	0.530755
SARC	1p	0.298455	0.149026	0.0463289	0.15651	0.805458			SARC	1p	0.000970953	0.187415	0.995871	0.995871	0.00179705
SARC	1q	0.145165	0.146213	0.321789	0.541815	0.266149			SARC	1q	-0.0322051	0.178639	0.857083	0.903414	0.0441131
SARC	20p	0.129388	0.193103	0.503504	0.696257	0.15723			SARC	20p	0.262405	0.132537	0.0488204	0.141468	0.849342
SARC	20q	-0.0738551	0.113307	0.515108	0.704697	0.151998			SARC	20q	1.18415	0.48627	0.0156329	0.0626133	1.20333
SARC	21q	0.449168	0.111242	7.4633e-05	0.00120022	2.92074			SARC	21q	0.368713	0.117562	0.00195018	0.0129729	1.88696
SARC	22q	0.128966	0.115479	0.265372	0.47418	0.324057			SARC	22q	0.309019	0.0988571	0.00201381	0.0131672	1.88051
SARC	2p	0.312728	0.206855	0.131927	0.313221	0.504149			SARC	2p	0.271335	0.151899	0.0752741	0.190749	0.719538
SARC	2q	0.972008	0.403172	0.0166501	0.0728903	1.13733			SARC	2q	0.538504	0.202148	0.00821802	0.0391446	1.40733
SARC	3p	0.266442	0.168307	0.114702	0.282454	0.549052			SARC	3p	0.185474	0.19552	0.343754	0.511618	0.291055
SARC	3q	-0.288965	0.348828	0.408248	0.61393	0.211881			SARC	3q	0.470692	0.201514	0.0202845	0.0764418	1.11667
SARC	4p	0.433677	0.139361	0.00207849	0.0167128	1.77695			SARC	4p	0.219906	0.216857	0.311606	0.479335	0.319361
SARC	4q	0.189052	0.316422	0.55076	0.724538	0.139939			SARC	4q	0.331204	0.169733	0.0521267	0.147692	0.830642
SARC	5p	0.244365	0.0846809	0.00424229	0.0275126	1.56047			SARC	5p	0.0866048	0.355867	0.807953	0.880462	0.0552895
SARC	5q	0.216931	0.180064	0.229451	0.43992	0.356627			SARC	5q	0.335007	0.23412	0.153717	0.297704	0.526215
SARC	6p	0.162978	0.167404	0.331284	0.546133	0.262702			SARC	6p	-0.0490489	0.151482	0.74637	0.833716	0.0789817
SARC	6q	0.222861	0.157524	0.158399	0.341191	0.467003			SARC	6q	0.438432	0.212711	0.0403382	0.126334	0.898479
SARC	7p	0.265708	0.121173	0.0292557	0.111073	0.954392			SARC	7p	0.245974	0.221976	0.268956	0.425986	0.370605
SARC	7q	0.0412866	0.164529	0.802071	0.895229	0.0480657			SARC	7q	0.465598	0.213422	0.0300836	0.104136	0.982401
SARC	8p	-0.408394	0.231437	0.078964	0.220335	0.656916			SARC	8p	0.377347	0.114047	0.00107644	0.00784267	2.10554
SARC	8q	0.290472	0.1114	0.00967016	0.0508005	1.29413			SARC	8q	-0.0845845	0.268768	0.753256	0.836343	0.0776154
SARC	9p	0.206383	0.191249	0.281715	0.493314	0.306877			SARC	9p	0.0270471	0.0994094	0.785789	0.862451	0.0642656
SARC	9q	0.370502	0.13996	0.00863616	0.0464708	1.33282			SARC	9q	0.14604	0.204273	0.475374	0.638002	0.195178
SKCM	10p	-0.0586614	0.272236	0.829493	0.912906	0.0395739			SKCM	10p	0.228001	0.139833	0.10369	0.23608	0.62694
SKCM	10q	-0.21859	0.597197	0.714528	0.845417	0.0729288			SKCM	10q	0.0491898	0.110262	0.655725	0.775726	0.110292
SKCM	11p	0.137109	0.163259	0.40146	0.61361	0.212107			SKCM	11p	0.139582	0.17751	0.432094	0.602099	0.220332
SKCM	11q	0.393995	0.24906	0.114429	0.282454	0.549052			SKCM	11q	0.193198	0.0984943	0.0504371	0.144511	0.8401
SKCM	12p	0.169839	0.0974053	0.0819093	0.226472	0.644985			SKCM	12p	-0.332462	0.228488	0.146389	0.287887	0.540779
SKCM	12q	-0.00564517	0.247139	0.981787	0.991856	0.00355128			SKCM	12q	-0.0280635	0.151996	0.8536	0.903414	0.0441131
SKCM	13q	0.13632	0.0665747	0.0412738	0.145195	0.838047			SKCM	13q	0.128355	0.0766739	0.094958	0.221472	0.654681
SKCM	14q	0.0659936	0.115168	0.567001	0.738274	0.131783			SKCM	14q	0.253658	0.065598	0.000127545	0.00126717	2.89717
SKCM	15q	0.168057	0.0728867	0.0216118	0.0880622	1.05521			SKCM	15q	0.0526755	0.102849	0.608829	0.745207	0.127723
SKCM	16p	-0.110302	0.18324	0.547507	0.721464	0.141785			SKCM	16p	0.819585	0.423077	0.0533549	0.149511	0.825327
SKCM	16q	0.0598395	0.344198	0.862068	0.928019	0.0324432			SKCM	16q	0.0585846	0.0880376	0.506102	0.660697	0.179998
SKCM	17p	-0.308199	0.192024	0.109301	0.272561	0.564535			SKCM	17p	0.0969498	0.0804176	0.22862	0.383541	0.416188
SKCM	17q	-0.189102	0.0963496	0.0502963	0.164454	0.783955			SKCM	17q	-0.877414	0.416906	0.0359168	0.117034	0.931687
SKCM	18p	-0.0812239	0.121092	0.502726	0.696257	0.15723			SKCM	18p	0.25601	0.152884	0.0947369	0.221472	0.654681
SKCM	18q	-0.00237917	0.298334	0.993641	0.997438	0.00111409			SKCM	18q	-0.32781	0.167792	0.0513582	0.146056	0.835481
SKCM	19p	-0.11372	0.151055	0.451951	0.657291	0.182242			SKCM	19p	-0.107242	0.139838	0.443541	0.611368	0.213697
SKCM	19q	-0.0128849	0.231578	0.955654	0.977776	0.00976085			SKCM	19q	0.11218	0.176193	0.524656	0.680274	0.167316
SKCM	1p	0.259886	0.128959	0.0445107	0.152989	0.815339			SKCM	1p	-0.161545	0.105091	0.124967	0.262637	0.580645
SKCM	1q	0.0023892	0.0485812	0.960798	0.979442	0.00902113			SKCM	1q	0.207953	0.243183	0.393077	0.561015	0.251026
SKCM	20p	-0.00166835	0.206759	0.993566	0.997438	0.00111409			SKCM	20p	0.0835801	0.147608	0.571524	0.72122	0.141932
SKCM	20q	-0.00484583	0.0874343	0.955826	0.977776	0.00976085			SKCM	20q	NA	NA	NA	NA	NA
SKCM	21q	0.15063	0.0855721	0.0791305	0.220335	0.656916			SKCM	21q	0.160599	0.0812292	0.0487094	0.141468	0.849342
SKCM	22q	-0.00897796	0.0569125	0.874731	0.933994	0.0296558			SKCM	22q	0.113299	0.0981512	0.249162	0.408156	0.389174
SKCM	2p	0.0617937	0.22891	0.787324	0.885038	0.0530382			SKCM	2p	-0.310479	0.244692	0.205151	0.360783	0.442754
SKCM	2q	-0.109562	0.344953	0.750926	0.863978	0.0634975			SKCM	2q	-0.287413	0.228195	0.208497	0.363948	0.438961
SKCM	3p	-0.0665919	0.214754	0.756643	0.864359	0.0633056			SKCM	3p	0.15327	0.157694	0.331603	0.499363	0.301584
SKCM	3q	0.169725	0.136403	0.214057	0.417946	0.37888			SKCM	3q	-0.0298178	0.14922	0.841709	0.903096	0.0442659
SKCM	4p	0.076649	0.119766	0.522507	0.708667	0.149558			SKCM	4p	-0.176801	0.201554	0.38087	0.550028	0.259615
SKCM	4q	0.360774	0.265801	0.175382	0.363687	0.439273			SKCM	4q	-0.0808863	0.136508	0.553789	0.709333	0.14915
SKCM	5p	-0.0210407	0.0823367	0.79842	0.892418	0.0494317			SKCM	5p	0.0825729	0.178052	0.643065	0.769867	0.113584
SKCM	5q	-0.0248245	0.177252	0.888685	0.941677	0.0260978			SKCM	5q	0.276878	0.107329	0.0102073	0.0462045	1.33532
SKCM	6p	0.0121835	0.0464001	0.792998	0.888879	0.0511573			SKCM	6p	0.0906833	0.34821	0.7947	0.868494	0.0612333
SKCM	6q	-0.0145187	0.122189	0.905486	0.955185	0.0199125			SKCM	6q	0.106553	0.0642476	0.0979334	0.227028	0.643922
SKCM	7p	0.021492	0.0913123	0.814029	0.90092	0.0453139			SKCM	7p	0.201658	0.42531	0.635639	0.767735	0.114789
SKCM	7q	0.0677754	0.105499	0.52092	0.708667	0.149558			SKCM	7q	0.274829	0.427047	0.520206	0.67565	0.170278
SKCM	8p	0.0943561	0.106583	0.376519	0.589854	0.229255			SKCM	8p	0.0515172	0.0873739	0.555752	0.709766	0.148885
SKCM	8q	0.0328771	0.0524375	0.53099	0.711598	0.147765			SKCM	8q	0.189713	0.61029	0.75608	0.838262	0.0766202
SKCM	9p	0.0875134	0.24056	0.716223	0.846152	0.0725515			SKCM	9p	0.125103	0.0680848	0.0668022	0.175013	0.756931
SKCM	9q	0.420724	0.244249	0.0856846	0.232826	0.632969			SKCM	9q	0.0725507	0.140628	0.606174	0.745038	0.127821
STAD	10p	0.233658	0.150311	0.120879	0.295815	0.52898			STAD	10p	0.39407	0.24271	0.105295	0.238316	0.622847
STAD	10q	0.608006	0.355268	0.087811	0.23456	0.629747			STAD	10q	0.390506	0.205325	0.0579141	0.158797	0.799159
STAD	11p	0.675604	0.495865	0.173836	0.363051	0.440032			STAD	11p	0.400408	0.238195	0.0935497	0.221472	0.654681
STAD	11q	0.214561	0.157242	0.173177	0.362935	0.440171			STAD	11q	0.29421	0.417463	0.48139	0.639994	0.193824
STAD	12p	0.179006	0.106308	0.0930304	0.24194	0.616291			STAD	12p	0.406133	0.180667	0.0251631	0.0910845	1.04056
STAD	12q	0.503703	0.293194	0.0865866	0.233146	0.632372			STAD	12q	0.170185	0.317857	0.592667	0.737511	0.132232
STAD	13q	0.130481	0.072323	0.0719977	0.207059	0.683906			STAD	13q	0.461893	0.180374	0.0109209	0.0484146	1.31502
STAD	14q	0.599674	0.233913	0.0107794	0.0548013	1.26121			STAD	14q	0.428022	0.102166	3.46283e-05	0.000407549	3.38982
STAD	15q	0.497209	0.169255	0.00352265	0.0237252	1.62479			STAD	15q	0.48606	0.111806	1.76801e-05	0.000235063	3.62882
STAD	16p	0.0568257	0.171821	0.74103	0.861079	0.0649572			STAD	16p	0.809732	0.236214	0.000673981	0.00526118	2.27892
STAD	16q	0.631397	0.317149	0.0472184	0.15651	0.805458			STAD	16q	0.183958	0.156473	0.240446	0.397282	0.400901
STAD	17p	NA	NA	NA	NA	NA			STAD	17p	0.245008	0.0979498	0.0127723	0.0548922	1.26049
STAD	17q	0.261282	0.185031	0.158702	0.341191	0.467003			STAD	17q	NA	NA	NA	NA	NA
STAD	18p	0.310836	0.130526	0.0177252	0.0763248	1.11733			STAD	18p	0.0839528	0.25568	0.742831	0.833716	0.0789817
STAD	18q	0.170624	0.288827	0.55506	0.726131	0.138985			STAD	18q	0.302875	0.121384	0.0129968	0.0555449	1.25536
STAD	19p	0.831681	0.411851	0.0441444	0.152989	0.815339			STAD	19p	0.374778	0.184025	0.0423602	0.12935	0.888233
STAD	19q	0.438933	0.129179	0.000747953	0.0078585	2.10466			STAD	19q	0.924661	0.49618	0.0631693	0.168967	0.772199
STAD	1p	NA	NA	NA	NA	NA			STAD	1p	0.314338	0.185494	0.0909336	0.218755	0.660041
STAD	1q	0.437579	0.104824	3.67582e-05	0.000658307	3.18157			STAD	1q	0.38378	0.49299	0.436808	0.604439	0.218647
STAD	20p	0.339431	0.139095	0.015119	0.0692661	1.15948			STAD	20p	0.166007	0.267844	0.535766	0.692333	0.159685
STAD	20q	0.208793	0.0823232	0.0115857	0.0577817	1.23821			STAD	20q	NA	NA	NA	NA	NA
STAD	21q	0.614121	0.322463	0.0578219	0.178432	0.748527			STAD	21q	0.271423	0.0777761	0.000538154	0.00437966	2.35856
STAD	22q	0.265838	0.182035	0.14515	0.329621	0.481985			STAD	22q	0.425666	0.0901893	3.31721e-06	5.76743e-05	4.23902
STAD	2p	-0.118506	0.251364	0.637577	0.797865	0.0980708			STAD	2p	0.465416	0.411365	0.258584	0.41471	0.382256
STAD	2q	-0.304284	0.412808	0.461495	0.663048	0.178455			STAD	2q	-0.0741609	0.407406	0.855651	0.903414	0.0441131
STAD	3p	0.134147	0.409815	0.743597	0.861079	0.0649572			STAD	3p	0.433372	0.153375	0.00495915	0.0268463	1.57112
STAD	3q	0.244645	0.122888	0.04719	0.15651	0.805458			STAD	3q	0.765507	0.500926	0.127316	0.262917	0.580182
STAD	4p	0.382838	0.228902	0.0952289	0.246843	0.607579			STAD	4p	0.19655	0.216542	0.364609	0.531287	0.274671
STAD	4q	0.0290608	0.544048	0.957428	0.977776	0.00976085			STAD	4q	0.138804	0.269257	0.606487	0.745038	0.127821
STAD	5p	0.336064	0.0819611	5.00461e-05	0.000857311	3.06686			STAD	5p	NA	NA	NA	NA	NA
STAD	5q	-0.0131166	0.309857	0.966257	0.983333	0.00729956			STAD	5q	0.337283	0.1297	0.00965791	0.0442413	1.35417
STAD	6p	0.59895	0.223042	0.00755038	0.0421964	1.37472			STAD	6p	1.15057	0.404437	0.00467852	0.0256975	1.59011
STAD	6q	0.220938	0.226145	0.329191	0.544746	0.263806			STAD	6q	0.0144151	0.227119	0.949425	0.964556	0.0156727
STAD	7p	0.258383	0.0882647	0.00361526	0.0241426	1.61722			STAD	7p	-0.197235	0.720395	0.784405	0.862169	0.0644074
STAD	7q	0.38842	0.20811	0.0627313	0.187244	0.727593			STAD	7q	0.147028	0.268851	0.584778	0.732169	0.135388
STAD	8p	0.104807	0.172919	0.544835	0.719145	0.143183			STAD	8p	0.395523	0.105799	0.000213113	0.00198818	2.70154
STAD	8q	0.307235	0.0764073	6.9331e-05	0.00113818	2.94379			STAD	8q	NA	NA	NA	NA	NA
STAD	9p	0.233667	0.225711	0.301252	0.520585	0.283508			STAD	9p	0.200355	0.110618	0.0708663	0.183509	0.736342
STAD	9q	0.215629	0.179853	0.231286	0.441292	0.355274			STAD	9q	0.795443	0.26703	0.00307811	0.0191444	1.71796
TGCT	10p	1.05258	0.748585	0.162101	0.3443	0.463063			TGCT	10p	0.298451	0.325171	0.360383	0.528457	0.276991
TGCT	10q	-0.590534	0.64476	0.361379	0.578446	0.237737			TGCT	10q	NA	NA	NA	NA	NA
TGCT	11p	NA	NA	NA	NA	NA			TGCT	11p	-0.329072	0.210797	0.12088	0.259028	0.586653
TGCT	11q	NA	NA	NA	NA	NA			TGCT	11q	0.026619	0.1392	0.848638	0.903414	0.0441131
TGCT	12p	0.320972	0.0622696	8.9871e-07	3.3723e-05	4.47207			TGCT	12p	NA	NA	NA	NA	NA
TGCT	12q	0.352336	0.120016	0.00392193	0.025754	1.58915			TGCT	12q	NA	NA	NA	NA	NA
TGCT	13q	NA	NA	NA	NA	NA			TGCT	13q	0.197126	0.111391	0.0790718	0.198328	0.702617
TGCT	14q	0.0445687	0.13535	0.7425	0.861079	0.0649572			TGCT	14q	0.595164	0.22278	0.00877802	0.0411975	1.38513
TGCT	15q	-0.200265	0.151645	0.189141	0.382162	0.417752			TGCT	15q	0.282491	0.18389	0.127499	0.262917	0.580182
TGCT	16p	NA	NA	NA	NA	NA			TGCT	16p	NA	NA	NA	NA	NA
TGCT	16q	0.813585	0.651224	0.213794	0.417946	0.37888			TGCT	16q	-0.0998912	0.375302	0.79053	0.865172	0.0628976
TGCT	17p	0.992216	0.654219	0.13215	0.313221	0.504149			TGCT	17p	-0.0752446	0.158736	0.636267	0.767735	0.114789
TGCT	17q	0.31509	0.249218	0.208328	0.411435	0.385699			TGCT	17q	NA	NA	NA	NA	NA
TGCT	18p	0.153046	0.491205	0.75586	0.864359	0.0633056			TGCT	18p	-0.062218	0.292066	0.831637	0.896059	0.0476632
TGCT	18q	NA	NA	NA	NA	NA			TGCT	18q	-0.30447	0.249702	0.224876	0.379534	0.420749
TGCT	19p	-0.358742	0.267056	0.181508	0.371434	0.430119			TGCT	19p	0.610589	0.387629	0.117701	0.256134	0.591532
TGCT	19q	NA	NA	NA	NA	NA			TGCT	19q	0.599551	0.264879	0.0252252	0.0910845	1.04056
TGCT	1p	0.109748	0.661384	0.868483	0.931334	0.0308945			TGCT	1p	0.0347329	0.197847	0.860913	0.904668	0.0435106
TGCT	1q	0.102855	0.157396	0.514578	0.704697	0.151998			TGCT	1q	NA	NA	NA	NA	NA
TGCT	20p	-0.735119	0.372425	0.050713	0.165131	0.78217			TGCT	20p	0.235144	0.182098	0.19889	0.352201	0.453209
TGCT	20q	0.0878505	0.458796	0.848441	0.916934	0.0376621			TGCT	20q	NA	NA	NA	NA	NA
TGCT	21q	0.105902	0.0938208	0.261027	0.46854	0.329254			TGCT	21q	NA	NA	NA	NA	NA
TGCT	22q	-0.125387	0.143722	0.384894	0.594698	0.225703			TGCT	22q	0.38201	0.147283	0.010811	0.0484146	1.31502
TGCT	2p	0.273658	0.223235	0.222412	0.431677	0.364841			TGCT	2p	NA	NA	NA	NA	NA
TGCT	2q	-0.657803	0.288583	0.024259	0.0960607	1.01745			TGCT	2q	0.676468	0.452942	0.137768	0.277348	0.556974
TGCT	3p	0.181432	0.458603	0.693045	0.83151	0.0801323			TGCT	3p	0.30915	0.296828	0.299555	0.467673	0.330058
TGCT	3q	0.185342	0.329128	0.574302	0.745552	0.127522			TGCT	3q	0.592915	0.748996	0.43004	0.600329	0.221611
TGCT	4p	NA	NA	NA	NA	NA			TGCT	4p	-0.590903	0.382274	0.12454	0.262637	0.580645
TGCT	4q	NA	NA	NA	NA	NA			TGCT	4q	0.269702	0.202254	0.184653	0.337641	0.471545
TGCT	5p	NA	NA	NA	NA	NA			TGCT	5p	0.438306	0.37752	0.247716	0.406658	0.390771
TGCT	5q	NA	NA	NA	NA	NA			TGCT	5q	-0.472195	0.374072	0.209046	0.363948	0.438961
TGCT	6p	0.0173235	0.327719	0.957922	0.977776	0.00976085			TGCT	6p	NA	NA	NA	NA	NA
TGCT	6q	0.104305	0.328954	0.751686	0.863978	0.0634975			TGCT	6q	0.08775	0.458015	0.848367	0.903414	0.0441131
TGCT	7p	0.315344	0.120664	0.00999726	0.0518631	1.28514			TGCT	7p	NA	NA	NA	NA	NA
TGCT	7q	0.402761	0.182826	0.0293187	0.111073	0.954392			TGCT	7q	NA	NA	NA	NA	NA
TGCT	8p	0.316074	0.173078	0.0701149	0.203876	0.690633			TGCT	8p	0.605786	0.38312	0.116444	0.254514	0.594289
TGCT	8q	0.233009	0.157701	0.141896	0.326801	0.485717			TGCT	8q	NA	NA	NA	NA	NA
TGCT	9p	0.158818	0.30055	0.598215	0.765071	0.116298			TGCT	9p	0.189211	0.172748	0.275442	0.435358	0.361154
TGCT	9q	0.254056	0.309841	0.413802	0.621097	0.20684			TGCT	9q	-0.0390878	0.239094	0.870396	0.909635	0.0411326
THCA	10p	NA	NA	NA	NA	NA			THCA	10p	NA	NA	NA	NA	NA
THCA	10q	NA	NA	NA	NA	NA			THCA	10q	NA	NA	NA	NA	NA
THCA	11p	-0.28515	0.283099	0.314304	0.536086	0.270765			THCA	11p	NA	NA	NA	NA	NA
THCA	11q	NA	NA	NA	NA	NA			THCA	11q	0.330053	0.163764	0.0443957	0.133536	0.874401
THCA	12p	0.830944	0.278592	0.00299715	0.0212019	1.67362			THCA	12p	NA	NA	NA	NA	NA
THCA	12q	0.415472	0.139296	0.00299715	0.0212019	1.67362			THCA	12q	NA	NA	NA	NA	NA
THCA	13q	0.107929	0.162345	0.506482	0.697742	0.156305			THCA	13q	0.13976	0.0860777	0.105086	0.238316	0.622847
THCA	14q	0.085512	0.0951673	0.369329	0.585577	0.232416			THCA	14q	0.68522	0.280603	0.0149598	0.0608735	1.21557
THCA	15q	NA	NA	NA	NA	NA			THCA	15q	0.0562501	0.107179	0.599937	0.743268	0.128855
THCA	16p	-0.115497	0.162638	0.477944	0.677374	0.169171			THCA	16p	NA	NA	NA	NA	NA
THCA	16q	NA	NA	NA	NA	NA			THCA	16q	0.372587	0.280656	0.18493	0.337641	0.471545
THCA	17p	NA	NA	NA	NA	NA			THCA	17p	0.343893	0.125728	0.00645564	0.0329238	1.48249
THCA	17q	0.294352	0.162734	0.0710833	0.205178	0.687869			THCA	17q	NA	NA	NA	NA	NA
THCA	18p	NA	NA	NA	NA	NA			THCA	18p	NA	NA	NA	NA	NA
THCA	18q	NA	NA	NA	NA	NA			THCA	18q	NA	NA	NA	NA	NA
THCA	19p	NA	NA	NA	NA	NA			THCA	19p	0.266796	0.140829	0.0587387	0.160482	0.794572
THCA	19q	NA	NA	NA	NA	NA			THCA	19q	NA	NA	NA	NA	NA
THCA	1p	NA	NA	NA	NA	NA			THCA	1p	0.801838	0.281406	0.00456094	0.0256975	1.59011
THCA	1q	0.262492	0.0544483	1.89874e-06	6.80093e-05	4.16743			THCA	1q	NA	NA	NA	NA	NA
THCA	20p	NA	NA	NA	NA	NA			THCA	20p	NA	NA	NA	NA	NA
THCA	20q	NA	NA	NA	NA	NA			THCA	20q	NA	NA	NA	NA	NA
THCA	21q	0.523188	0.162328	0.00135225	0.0123904	1.90692			THCA	21q	-0.0409908	0.114423	0.720317	0.822452	0.0848895
THCA	22q	-0.304662	0.286077	0.287497	0.500106	0.300938			THCA	22q	0.0301576	0.0340418	0.376097	0.545947	0.262849
THCA	2p	0.86902	0.278711	0.001926	0.0158092	1.80109			THCA	2p	0.124152	0.278769	0.656255	0.775726	0.110292
THCA	2q	0.458488	0.281363	0.103832	0.263934	0.578504			THCA	2q	NA	NA	NA	NA	NA
THCA	3p	0.391653	0.280912	0.163871	0.346194	0.460681			THCA	3p	NA	NA	NA	NA	NA
THCA	3q	NA	NA	NA	NA	NA			THCA	3q	-0.205349	0.28273	0.467989	0.633649	0.198151
THCA	4p	NA	NA	NA	NA	NA			THCA	4p	NA	NA	NA	NA	NA
THCA	4q	NA	NA	NA	NA	NA			THCA	4q	NA	NA	NA	NA	NA
THCA	5p	0.28271	0.0949259	0.00304038	0.0212019	1.67362			THCA	5p	0.107138	0.279103	0.701243	0.804274	0.0945959
THCA	5q	NA	NA	NA	NA	NA			THCA	5q	NA	NA	NA	NA	NA
THCA	6p	0.657675	0.281287	0.0197758	0.0824513	1.0838			THCA	6p	NA	NA	NA	NA	NA
THCA	6q	NA	NA	NA	NA	NA			THCA	6q	-0.0144617	0.163304	0.92947	0.948059	0.0231646
THCA	7p	NA	NA	NA	NA	NA			THCA	7p	NA	NA	NA	NA	NA
THCA	7q	-0.10745	0.199442	0.590298	0.758817	0.119863			THCA	7q	NA	NA	NA	NA	NA
THCA	8p	NA	NA	NA	NA	NA			THCA	8p	NA	NA	NA	NA	NA
THCA	8q	0.847008	0.279043	0.00252732	0.0189669	1.722			THCA	8q	NA	NA	NA	NA	NA
THCA	9p	NA	NA	NA	NA	NA			THCA	9p	NA	NA	NA	NA	NA
THCA	9q	0.247457	0.277467	0.372912	0.58771	0.230837			THCA	9q	0.438084	0.100045	1.45443e-05	0.000198686	3.70183
THYM	10p	NA	NA	NA	NA	NA			THYM	10p	NA	NA	NA	NA	NA
THYM	10q	NA	NA	NA	NA	NA			THYM	10q	NA	NA	NA	NA	NA
THYM	11p	NA	NA	NA	NA	NA			THYM	11p	-0.905095	0.651884	0.167786	0.318194	0.497309
THYM	11q	NA	NA	NA	NA	NA			THYM	11q	NA	NA	NA	NA	NA
THYM	12p	NA	NA	NA	NA	NA			THYM	12p	NA	NA	NA	NA	NA
THYM	12q	NA	NA	NA	NA	NA			THYM	12q	NA	NA	NA	NA	NA
THYM	13q	NA	NA	NA	NA	NA			THYM	13q	-0.842137	0.458705	0.0690491	0.180282	0.744048
THYM	14q	-0.666251	0.348433	0.0584599	0.178552	0.748236			THYM	14q	-0.184107	0.915301	0.840968	0.903096	0.0442659
THYM	15q	-0.544343	0.350686	0.123507	0.299458	0.523664			THYM	15q	-0.309681	0.657968	0.638839	0.768554	0.114325
THYM	16p	0.778062	0.913829	0.396363	0.610028	0.21465			THYM	16p	NA	NA	NA	NA	NA
THYM	16q	NA	NA	NA	NA	NA			THYM	16q	-0.307597	0.335062	0.360594	0.528457	0.276991
THYM	17p	NA	NA	NA	NA	NA			THYM	17p	-0.217628	0.384227	0.572262	0.72122	0.141932
THYM	17q	-0.45677	0.463986	0.327037	0.544746	0.263806			THYM	17q	NA	NA	NA	NA	NA
THYM	18p	NA	NA	NA	NA	NA			THYM	18p	NA	NA	NA	NA	NA
THYM	18q	NA	NA	NA	NA	NA			THYM	18q	NA	NA	NA	NA	NA
THYM	19p	NA	NA	NA	NA	NA			THYM	19p	NA	NA	NA	NA	NA
THYM	19q	NA	NA	NA	NA	NA			THYM	19q	NA	NA	NA	NA	NA
THYM	1p	NA	NA	NA	NA	NA			THYM	1p	-0.280489	0.53399	0.600444	0.743268	0.128855
THYM	1q	-0.296927	0.202169	0.14474	0.329621	0.481985			THYM	1q	NA	NA	NA	NA	NA
THYM	20p	NA	NA	NA	NA	NA			THYM	20p	NA	NA	NA	NA	NA
THYM	20q	NA	NA	NA	NA	NA			THYM	20q	NA	NA	NA	NA	NA
THYM	21q	-0.530414	0.383975	0.170125	0.3575	0.446725			THYM	21q	-0.503264	0.356298	0.160684	0.308078	0.511339
THYM	22q	-0.552082	0.378058	0.147163	0.331082	0.480064			THYM	22q	-0.0765053	0.422162	0.856532	0.903414	0.0441131
THYM	2p	-0.125528	0.918023	0.891487	0.941677	0.0260978			THYM	2p	NA	NA	NA	NA	NA
THYM	2q	NA	NA	NA	NA	NA			THYM	2q	-0.125528	0.918023	0.891487	0.924383	0.0341479
THYM	3p	NA	NA	NA	NA	NA			THYM	3p	-0.495456	0.384391	0.200099	0.353524	0.451581
THYM	3q	-0.517778	0.374998	0.17013	0.3575	0.446725			THYM	3q	NA	NA	NA	NA	NA
THYM	4p	NA	NA	NA	NA	NA			THYM	4p	-0.409732	0.923375	0.6581	0.775726	0.110292
THYM	4q	NA	NA	NA	NA	NA			THYM	4q	NA	NA	NA	NA	NA
THYM	5p	-0.125528	0.918023	0.891487	0.941677	0.0260978			THYM	5p	NA	NA	NA	NA	NA
THYM	5q	NA	NA	NA	NA	NA			THYM	5q	NA	NA	NA	NA	NA
THYM	6p	NA	NA	NA	NA	NA			THYM	6p	-0.642153	0.918236	0.485807	0.641128	0.193055
THYM	6q	NA	NA	NA	NA	NA			THYM	6q	-1.86382	0.898359	0.0403265	0.126334	0.898479
THYM	7p	NA	NA	NA	NA	NA			THYM	7p	NA	NA	NA	NA	NA
THYM	7q	-1.63911	0.904823	0.0727629	0.207743	0.682473			THYM	7q	NA	NA	NA	NA	NA
THYM	8p	0.423971	0.914727	0.643918	0.801591	0.0960472			THYM	8p	NA	NA	NA	NA	NA
THYM	8q	NA	NA	NA	NA	NA			THYM	8q	NA	NA	NA	NA	NA
THYM	9p	NA	NA	NA	NA	NA			THYM	9p	-0.250843	0.657089	0.703378	0.805515	0.0939264
THYM	9q	NA	NA	NA	NA	NA			THYM	9q	NA	NA	NA	NA	NA
UCEC	10p	0.196772	0.157791	0.212957	0.417946	0.37888			UCEC	10p	0.739695	0.259273	0.00451053	0.0256975	1.59011
UCEC	10q	0.686752	0.266872	0.0103582	0.053348	1.27288			UCEC	10q	0.572051	0.184144	0.00199874	0.0131672	1.88051
UCEC	11p	0.764928	0.349799	0.0292251	0.111073	0.954392			UCEC	11p	0.654325	0.174878	0.000203524	0.00192631	2.71527
UCEC	11q	0.0177945	0.448366	0.968358	0.983333	0.00729956			UCEC	11q	0.285403	0.227895	0.211013	0.365215	0.437452
UCEC	12p	0.50045	0.134346	0.000217274	0.0029019	2.53732			UCEC	12p	0.545138	0.226245	0.016339	0.0644295	1.19092
UCEC	12q	0.77887	0.386267	0.0442792	0.152989	0.815339			UCEC	12q	0.816114	0.346962	0.0190411	0.0724698	1.13984
UCEC	13q	0.53318	0.144435	0.000250929	0.00318923	2.49631			UCEC	13q	0.513236	0.0933335	6.14883e-08	2.04515e-06	5.68927
UCEC	14q	0.272778	0.140726	0.0531798	0.169659	0.770424			UCEC	14q	0.568269	0.116449	1.43405e-06	3.2266e-05	4.49125
UCEC	15q	0.291485	0.25368	0.251195	0.458029	0.339107			UCEC	15q	0.555782	0.0866354	3.2145e-10	2.04924e-08	7.68841
UCEC	16p	0.204462	0.202869	0.314002	0.536086	0.270765			UCEC	16p	0.838667	0.347315	0.0161018	0.0640931	1.19319
UCEC	16q	0.77845	0.550366	0.157906	0.341191	0.467003			UCEC	16q	0.378308	0.114034	0.0009724	0.00715275	2.14553
UCEC	17p	0.560828	0.58805	0.340715	0.553624	0.256785			UCEC	17p	0.508362	0.126592	6.80813e-05	0.000723364	3.14064
UCEC	17q	0.311817	0.212162	0.14225	0.326801	0.485717			UCEC	17q	1.09255	0.547343	0.046461	0.13723	0.862549
UCEC	18p	0.305018	0.115757	0.00866904	0.0464708	1.33282			UCEC	18p	0.514197	0.355168	0.148328	0.290952	0.536179
UCEC	18q	0.544762	0.386188	0.158989	0.341191	0.467003			UCEC	18q	0.517172	0.164573	0.0017719	0.0120293	1.91976
UCEC	19p	0.539368	0.166817	0.00130389	0.0121579	1.91514			UCEC	19p	0.576589	0.217364	0.00823827	0.0391446	1.40733
UCEC	19q	0.54326	0.161019	0.000797464	0.00826845	2.08258			UCEC	19q	0.506697	0.316822	0.110377	0.245459	0.61002
UCEC	1p	0.0503653	0.293998	0.864047	0.92888	0.0320406			UCEC	1p	0.364837	0.276419	0.187468	0.341459	0.466662
UCEC	1q	-0.12959	0.0530614	0.0149296	0.0687985	1.16242			UCEC	1q	NA	NA	NA	NA	NA
UCEC	20p	0.364678	0.18117	0.0446543	0.152989	0.815339			UCEC	20p	0.103512	0.228167	0.650263	0.774404	0.111033
UCEC	20q	0.473327	0.129954	0.000297605	0.00360789	2.44275			UCEC	20q	0.0766418	0.548859	0.889003	0.924031	0.0343134
UCEC	21q	0.414862	0.132794	0.00189251	0.0158092	1.80109			UCEC	21q	0.528843	0.12529	2.90414e-05	0.000364208	3.43865
UCEC	22q	0.435044	0.207684	0.0367844	0.133577	0.87427			UCEC	22q	0.508049	0.0877567	1.24693e-08	5.29944e-07	6.27577
UCEC	2p	0.431423	0.133518	0.00131145	0.0121579	1.91514			UCEC	2p	0.152496	0.772741	0.84364	0.903414	0.0441131
UCEC	2q	0.641687	0.295417	0.0303043	0.114257	0.942116			UCEC	2q	0.467041	0.317418	0.141807	0.283244	0.547839
UCEC	3p	1.02477	0.387241	0.00839621	0.045629	1.34076			UCEC	3p	0.581389	0.164551	0.000447664	0.00376333	2.42443
UCEC	3q	0.527069	0.113422	4.28207e-06	0.00012978	3.88679			UCEC	3q	-0.498621	0.770517	0.517858	0.673743	0.171506
UCEC	4p	0.777502	0.320634	0.0156697	0.0705795	1.15132			UCEC	4p	0.563531	0.168032	0.000856519	0.00648749	2.18792
UCEC	4q	0.552369	0.776887	0.477413	0.677374	0.169171			UCEC	4q	0.569938	0.196111	0.00381558	0.0224532	1.64872
UCEC	5p	0.406492	0.103773	0.000101705	0.00157144	2.8037			UCEC	5p	0.691064	0.44794	0.123537	0.262517	0.580843
UCEC	5q	NA	NA	NA	NA	NA			UCEC	5q	0.54309	0.135167	6.74412e-05	0.000723364	3.14064
UCEC	6p	0.425902	0.159439	0.00779768	0.0429691	1.36684			UCEC	6p	0.366553	0.320119	0.252736	0.413126	0.383917
UCEC	6q	0.317362	0.276346	0.251334	0.458029	0.339107			UCEC	6q	0.549083	0.27478	0.046216	0.137036	0.863165
UCEC	7p	0.433751	0.218106	0.0472708	0.15651	0.805458			UCEC	7p	0.675568	0.237616	0.00464885	0.0256975	1.59011
UCEC	7q	0.300452	0.236543	0.204604	0.406116	0.39135			UCEC	7q	0.628955	0.235409	0.00778886	0.0377119	1.42352
UCEC	8p	0.391322	0.156601	0.0128051	0.0615268	1.21094			UCEC	8p	0.567082	0.092453	1.7366e-09	8.3031e-08	7.08076
UCEC	8q	0.358943	0.079869	8.63015e-06	0.000234502	3.62985			UCEC	8q	1.65246	0.780025	0.0346665	0.11431	0.941917
UCEC	9p	0.250894	0.133262	0.0603137	0.183039	0.737456			UCEC	9p	0.796957	0.236581	0.000813722	0.00628785	2.2015
UCEC	9q	-0.455143	0.548727	0.407257	0.61361	0.212107			UCEC	9q	0.6444	0.139966	5.22836e-06	7.99939e-05	4.09694

## Sheet: Supplementary Table 5
Supplementary Table 5. The mutation type ratio of the top 10 mutated genes in ccRCC patients with high and low KIFscore
High KIFscore group
Gene	Frame_Shift_Del	Frame_Shift_Ins	In_Frame_Del	In_Frame_Ins	Missense_Mutation	Nonsense_Mutation	Nonstop_Mutation	Splice_Site	Translation_Start_Site
VHL	0.2	0.11	0.02	0	0.47	0.1	0	0.1	0
PBRM1	0.46	0.1	0	0	0.12	0.25	0	0.07	0
TTN	0.02	0	0	0	0.85	0.12	0	0	0
SETD2	0.26	0.06	0.03	0	0.21	0.38	0	0.06	0
BAP1	0.13	0.03	0.03	0	0.27	0.33	0	0.17	0.03
MUC16	0	0	0.05	0	0.95	0	0	0	0
MTOR	0	0	0	0	1	0	0	0	0
HMCN1	0.17	0	0.08	0	0.58	0.17	0	0	0
XIRP2	0	0	0	0	0.82	0.18	0	0	0
PTEN	0.17	0.17	0	0	0.17	0.25	0	0.25	0
Low KIFscore group
Gene	Frame_Shift_Del	Frame_Shift_Ins	In_Frame_Del	In_Frame_Ins	Missense_Mutation	Nonsense_Mutation	Nonstop_Mutation	Splice_Site	Translation_Start_Site
VHL	0.24	0.12	0.01	0	0.28	0.23	0.01	0.11	0
PBRM1	0.33	0.05	0.01	0.01	0.17	0.27	0	0.16	0
TTN	0.14	0	0	0	0.79	0.05	0	0.02	0
SETD2	0.24	0.05	0	0	0.33	0.24	0	0.14	0
MTOR	0	0	0.06	0	0.94	0	0	0	0
KDM5C	0.42	0	0	0	0.25	0.33	0	0	0
MUC16	0	0	0	0	1	0	0	0	0
LRP2	0.09	0	0	0	0.82	0.09	0	0	0
DNAH9	0	0	0	0	0.91	0.09	0	0	0
ANK3	0.1	0.1	0	0	0.8	0	0	0	0
